# Supplementary material
Source: Elsevier journal article supplement (https://rcastoragev2.blob.core.windows.net/2ee680604bac20b52230ab834cd93afc/mmc1.pdf)
Supplement: mmc1 [file mmc1.pdf]

## **Supplemental Information**

### **Age-dependent instability of mature neuronal fate in induced neurons from Alzheimer's patients**

**Jerome Mertens, Joseph R. Herdy, Larissa Traxler, Simon T. Schafer, Johannes C.M. Schlachetzki, Lena Böhnke, Dylan A. Reid, Hyungjun Lee, Dina Zangwill, Diana P. Fernandes, Ravi K. Agarwal, Raffaella Lucciola, Lucia Zhou-Yang, Lukas Karbacher, Frank Edenhofer, Shani Stern, Steve Horvath, Apua C.M. Paquola, Christopher K. Glass, Shauna H. Yuan, Manching Ku, Attila Szücs, Lawrence S.B. Goldstein, Douglas Galasko, and Fred H. Gage**

# Age-dependent instability of mature neuronal fate in induced neurons from Alzheimer’s patients

Mertens et al.

**SUPPLEMENTARY INVENTORY**

|                               |                  |
|-------------------------------|------------------|
| Supplementary Figure S1 ..... | page 2           |
| Supplementary Figure S2 ..... | page 4           |
| Supplementary Figure S3 ..... | page 6           |
| Supplementary Figure S4 ..... | page 8           |
| Supplementary Figure S5 ..... | page 10          |
| Supplementary Figure S6 ..... | page 12          |
| Supplementary Figure S7 ..... | page 14          |
|                               |                  |
| Supplementary Table 1 .....   | page 15          |
| Supplementary Table 2 .....   | page 16          |
| Supplementary Table 3 .....   | in separate file |
| Supplementary Table 4 .....   | in separate file |
| Supplementary Table 5 .....   | page 17          |
| Supplementary Table 6 .....   | in separate file |
| Supplementary Table 7 .....   | page 20          |

## Supplementary Figure S1.

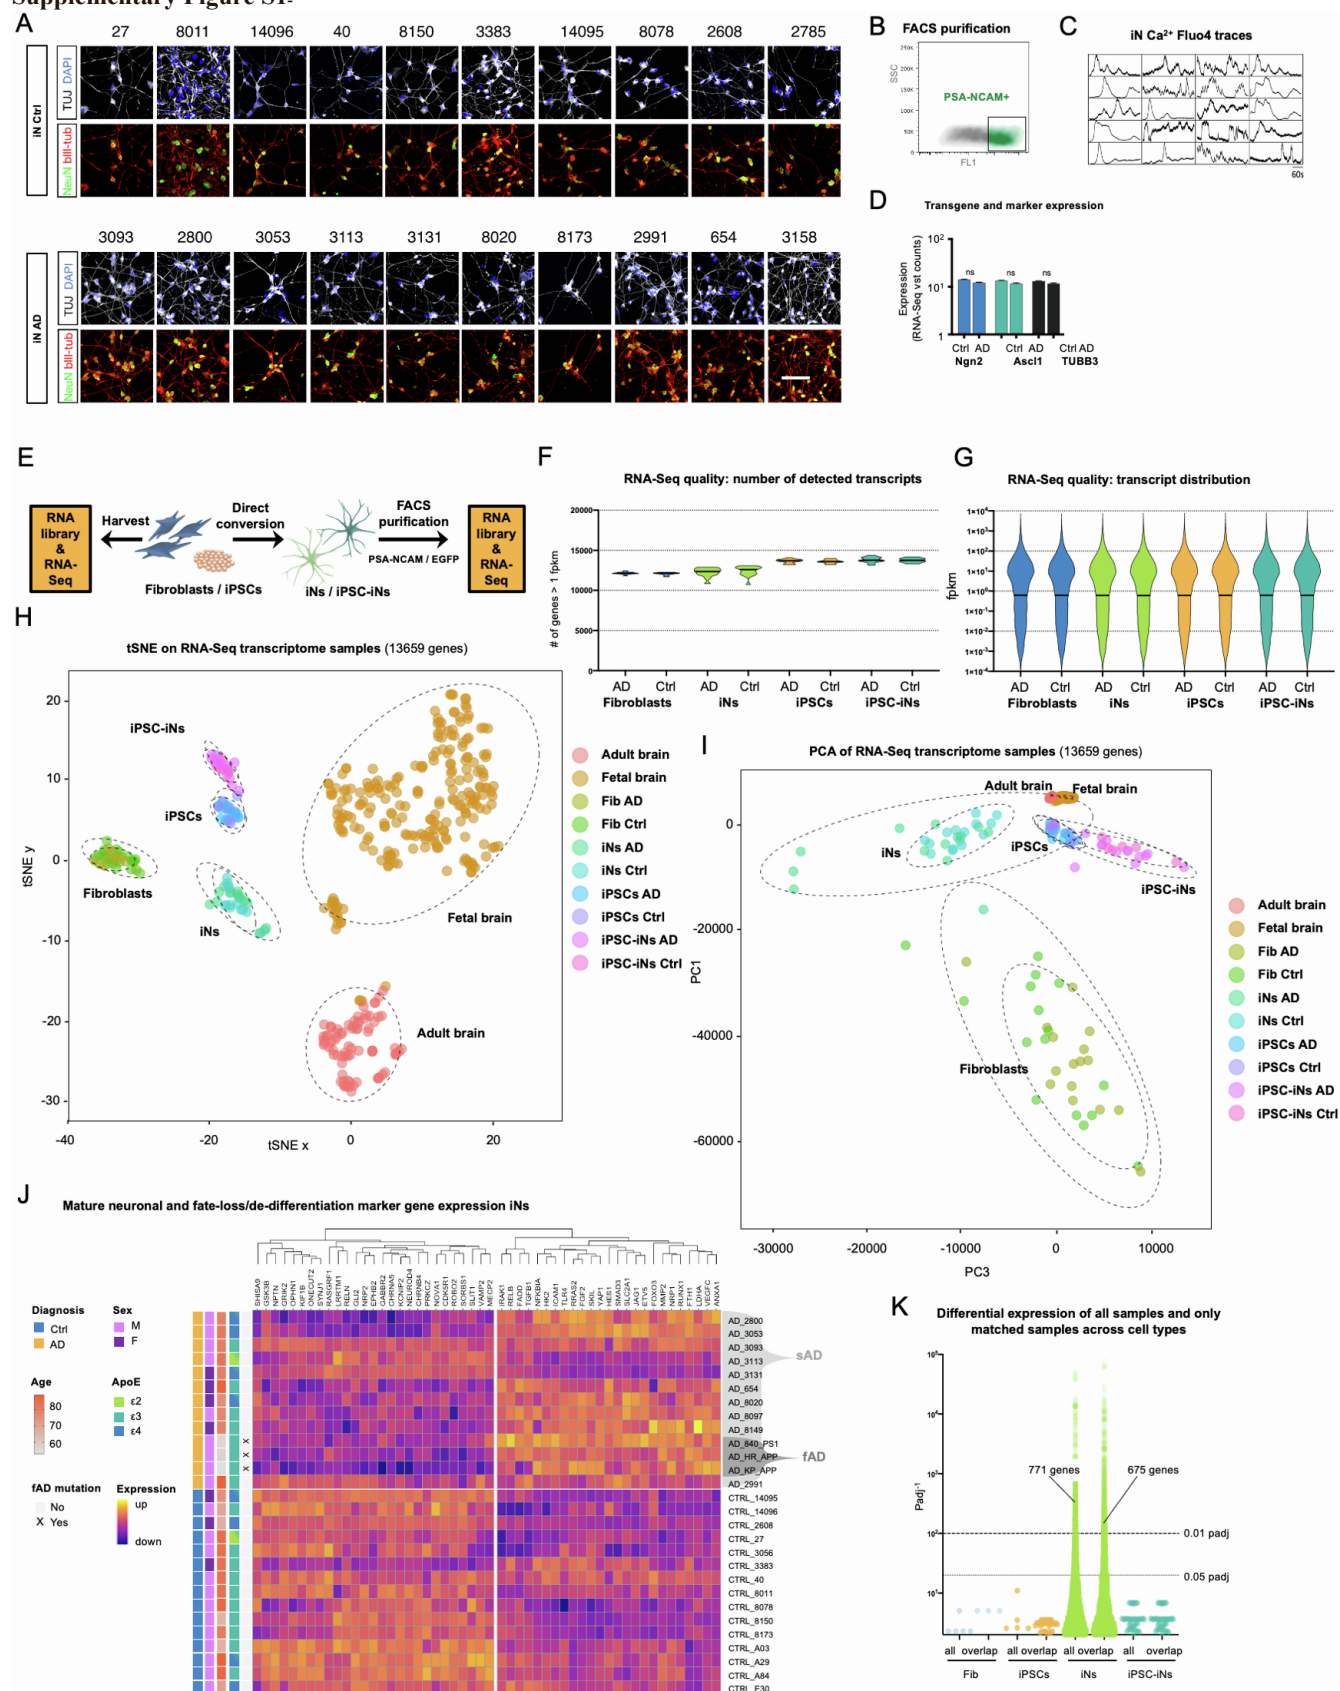

**Supplementary Figure 1. Conversion of human fibroblasts into iNs, and whole-genome mRNA-Seq analysis and AD-specific DE analysis of donor fibroblasts, iNs, iPSCs and iPSC-iNs. Related to Fig.1.**

**A:** Representative immunofluorescent images of iNs from 20 individual donors labeled with DAPI,  $\beta$ III-tub (TUJ), and NeuN. Scale bar, 100  $\mu$ m.

**B:** FACS gating for the isolation of PSA-NCAM<sup>+</sup> (box) iNs following 3 weeks of conversion.

**C:** Line plots of live-cell imaging fluorescence intensity of Fluo-4 Ca<sup>2+</sup> transients in 20 individuals iN cells (n=4, 2 control and 2 AD subjects) reveals spontaneous network activity of iNs. Boxes, individual ROIs/cells.

**D:** Similar expression levels (vst-normalized counts) of Ngn2 and Ascl1 transgenes in Ctrl and AD iNs, and levels of pan-neuronal marker gene TUBB3 ( $\beta$ III-tub). Bars, mean $\pm$ SEM; ns, FDR<0.05 (DESeq2).

**E:** Workflow for generation of mRNA-Seq transcriptome profiles from fibroblasts and iPSCs, and FACS-purified mRNA-Seq from iNs and iPSC-iNs following 3 weeks of conversion.

**F:** Violin plot showing deepness/quality of mRNA-Seq data from all 103 samples represented as the number of mapped reads with >1 fragments per kilobase of transcript per million (fpkm) per Ctrl and AD group. All samples show a high level of transcript detection and no apparent differences between control and AD samples are noted.

**G:** Violin plot for transcript distribution (fpkm) within each Ctrl and AD group indicates similar transcription level distribution between Ctrl and AD, and between all four cell types.

**H-I:** t-distributed stochastic neighbor embedding (tSNE, **H**) and principal component analysis (PCA, **I**) plots of mRNA-Seq data from fibroblasts (n=32), iNs (n=28), iPSCs (n=21), and iPSC-iNs (n=20), including all fetal (n=237) and adult (n=77) samples from the Allen BrainSpan RNA-Seq atlas. All 13,659 genes that were detected in our and the BrainSpan dataset were used for tSNE and PCA.

**J:** Heatmap based on vst-normalized counts depicting the mature neuronal and fate-loss/de-differentiation marker gene expression in control and AD iNs (sAD, sporadic AD; fAD, familial AD). All depicted marker genes are sorted via hierarchical clustering. All marker genes are both highly significant (padj<0.01) AD iN DE genes, and part of the key gene sets presented in Fig. 3C (mature neuronal gene sets) and Fig. 4D (fate-loss/de-differentiation gene sets).

**K:** Significant AD DE genes in all four cell types for the full set of samples (*all*), and for only those donors for which all four cell types are available (*overlap*, 8x Ctrl; 11x AD; with the exception of donor sample 3158 which is not available for iNs). This isogenic 'matched sample' analysis confirms significant AD DE gene expression only in iNs, but not in the other cell types.

## Supplementary Figure S2

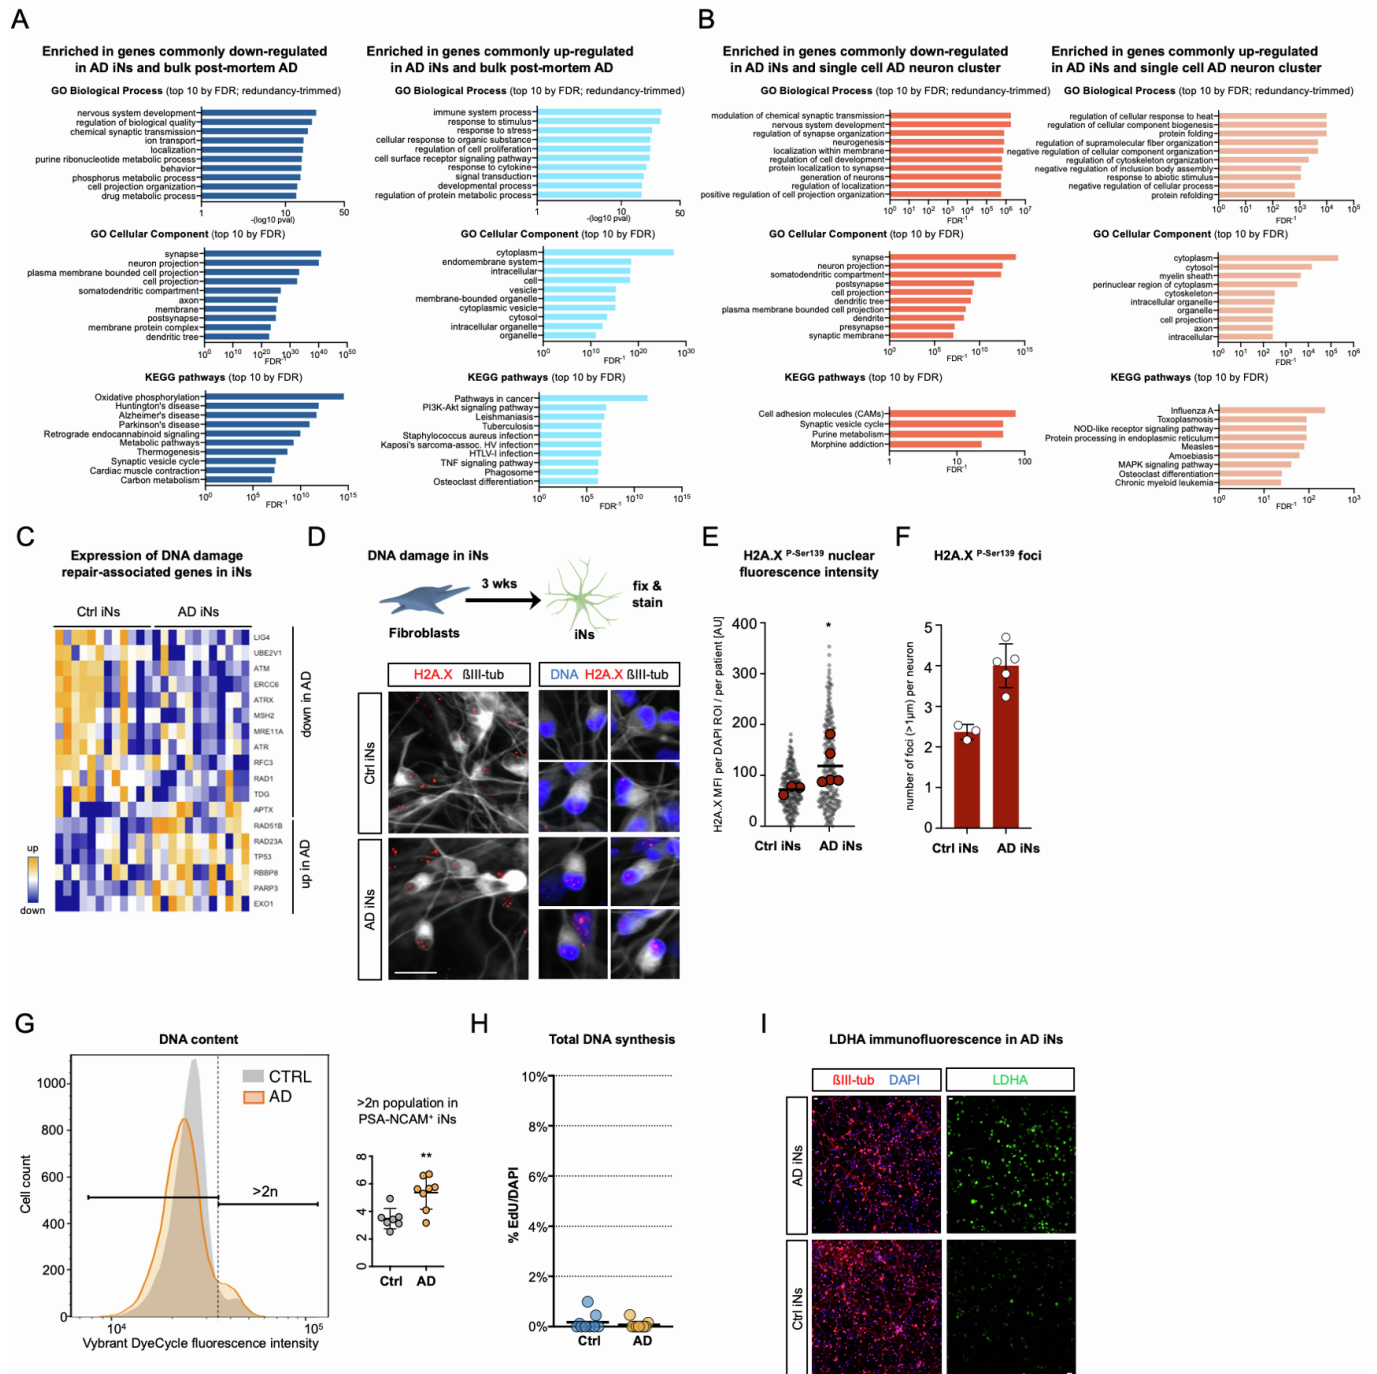

**Supplementary Figure S2. Gene set enrichment analysis of overlapping AD genes between iNs and post mortem brain, and DNA damage and aneuploidy assessment in AD iNs. Related to Fig.2 and Fig.5.**

**A:** Gene set enrichment analyses of down-regulated (left, dark blue) and up-regulated (right, light blue) genes that are commonly changed in the same direction in AD iNs and post mortem data sets (pooled genes from Fig. 2D). Bar graphs show all top 10 (by FDR) gene sets for each GSEA category (GO PB, GO CC, and KEGG).

**B:** Gene set enrichment analyses of down-regulated (left, dark orange) and up-regulated (right, light orange) genes that are commonly changed in the same direction in AD iNs and post mortem snRNA-Seq neurons (Grubman et al., 2019). Bar graphs show all top 10 (by FDR) gene sets for each GSEA category (GO PB, GO CC, and KEGG).

**C:** Heatmap based on vst-normalized counts depicting DNA damage repair-associated gene expression in control and AD iNs.

**D-F:** For the assessment of DNA damage levels, immunofluorescence analysis for H2A.X-pSer139 was performed following 3 weeks of conversion. Representative Immunofluorescence images show intensity and distribution of H2A.X-pSer139 immunoreactivity in iNs (**D**). Mean fluorescence intensities (MFI) of nuclear DAPI-colocalized H2A.X-pSer139 immunofluorescence intensity (**E**; gray circles, nuclei; red circles, subjects), and numbers of H2A.X-pSer139-positive foci (**F**; white circles, subjects) were quantified. Bars, mean $\pm$ SD; subjects, control (n=3); AD (n=5); unpaired t-test; scale bar, 100  $\mu$ m. unpaired t-test based on subjects, \*p<0.05.

**G:** DNA content of live control (n=7) and AD (n=8) iNs was measured following 3 weeks of conversion using the cell-permeable DNA marker Vybrant DyeCycle. FACS histogram shows merged averages of all tested control and AD iNs (left), and scatter plot shows fractions of cells with >2n DNA content for each individual (right). Bars, mean $\pm$ SD; unpaired t-test.

**H:** Quantification of control (n=9) and AD (n=9) iNs fluorescently labeled for DNA replication following 3 weeks of iN conversion and 72h of EdU exposure. EdU incorporation was only rarely observed in  $\beta$ III-tub<sup>-negative</sup> fibroblasts, and never in  $\beta$ III-tub<sup>+</sup> neurons (Fig. 5F). Circles, subjects.

**I:** Representative low-magnification immunofluorescence images of iNs for  $\beta$ III-tub and LDHA. Scale bars, 20  $\mu$ m.

## Supplementary Figure S3

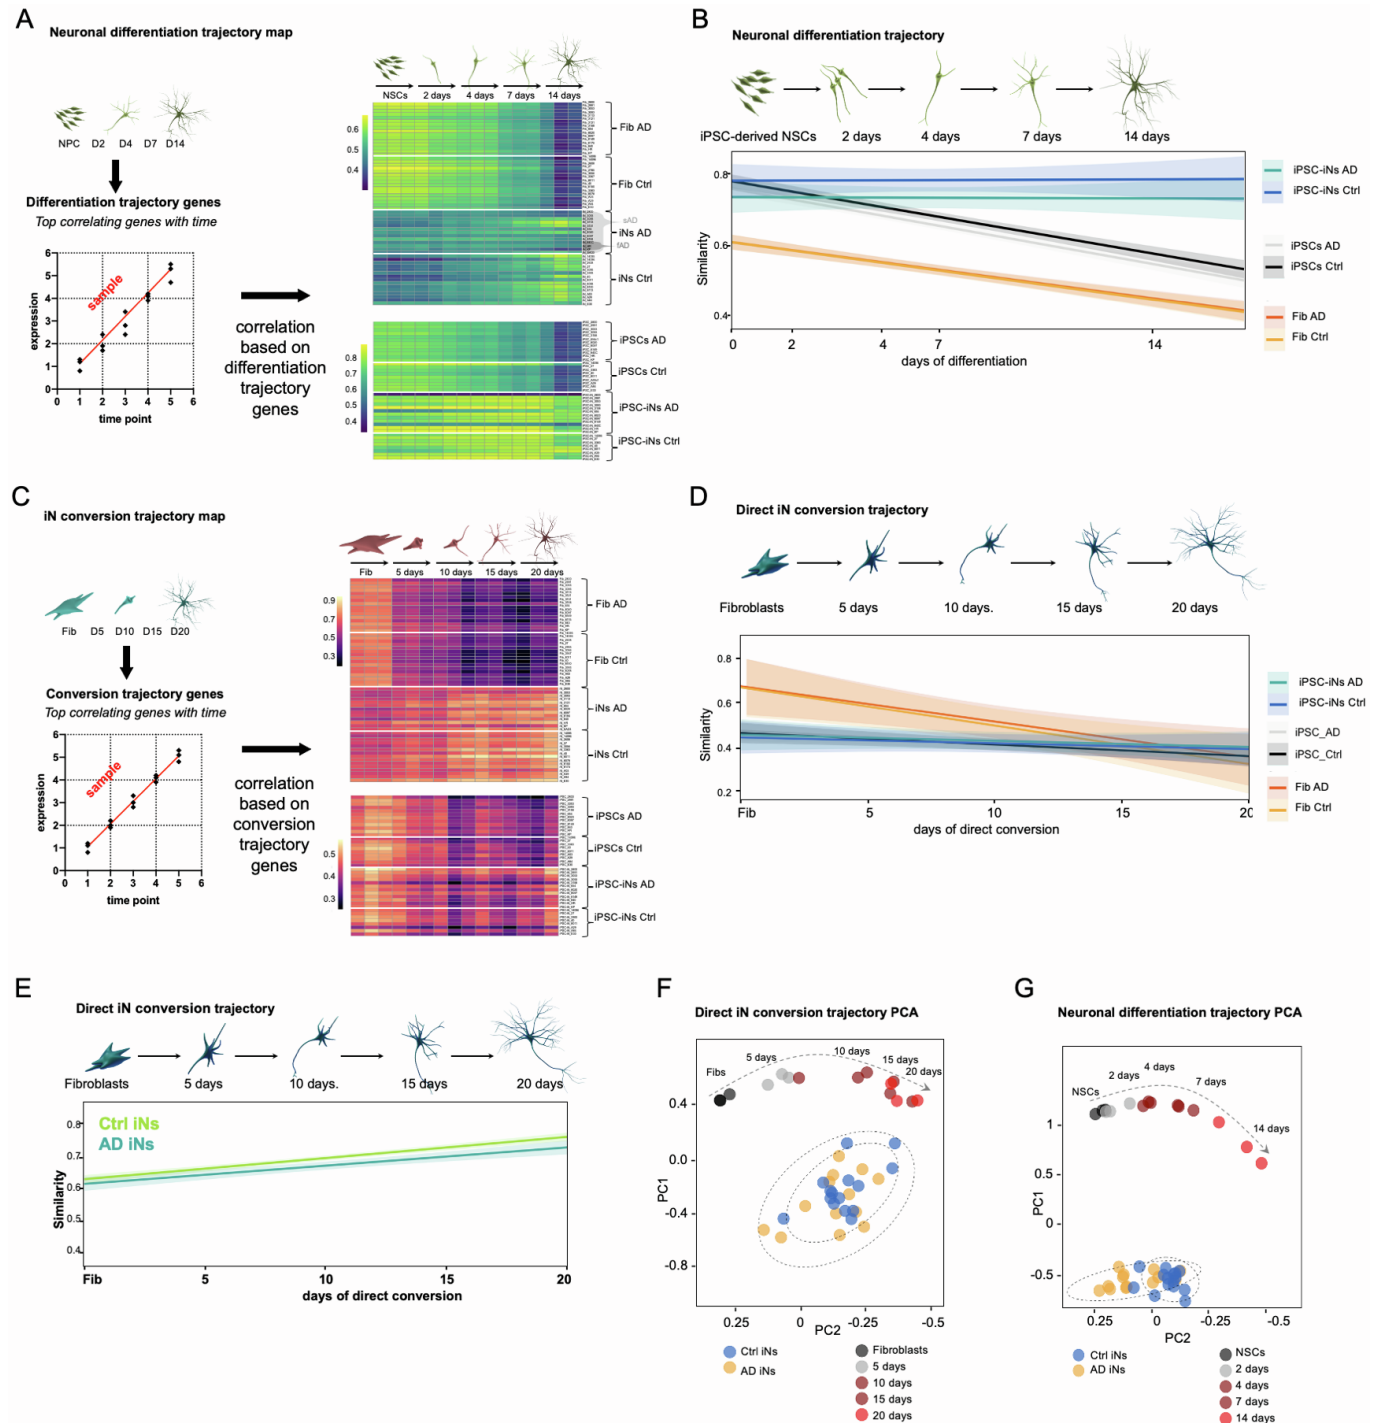

Supplementary Figure S3. Mapping of iN transcriptomes to the neuronal differentiation trajectory, and the direct iN conversion trajectory. Related to Fig.4.

**A:** Genes with the strongest linear regression with the differentiation timeline of iPSC-derived neural stem cells (365 genes;  $r^2 > 0.8$ , ) were used as differentiation trajectory genes. Pearson correlation based on differentiation trajectory genes was performed to compare all fibroblast, iN, iPSC, and iPSC-iN transcriptome samples to the five time points of neuronal differentiation (0, 2, 4, 7, and 14 days), displayed as a heatmap for all individual samples.

**B:** Similarity of fibroblasts, iPSCs, and iPSC-iNs (each separated into control and AD) to the neuronal differentiation trajectory from longitudinal mRNA-Seq data of iPSC-derived neural stem cells differentiation into neurons.

**C:** Genes with the strongest linear regression with the direct iN conversion timeline of fibroblasts into iNs (47 genes;  $r^2 > 0.9$ , (Herdy et al., 2019)) were used as conversion trajectory genes. Pearson correlation based on conversion trajectory genes was performed to compare all fibroblast, iN, iPSC, and iPSC-iN transcriptome samples to the five time points of neuronal conversion (0, 5, 10, 15, and 20 days), displayed as a heatmap for all individual samples.

**D-E:** Similarity of control and AD fibroblasts, iPSCs, and iPSC-iNs (**D**), and control and AD iNs (**E**) to the direct iN conversion trajectory from longitudinal mRNA-Seq data of fibroblast-to-iN conversion. Trajectory genes listed in Supplementary Table 4.

**F:** PCA based on neuronal differentiation trajectory genes, for the original differentiation trajectory samples (n=3 per time point;), and control and AD iNs.

**G:** PCA based on neuronal conversion trajectory genes, for the original differentiation trajectory samples (n=3 per time point; (Herdy et al., 2019)), and control and AD iNs.



Supplementary Figure S4

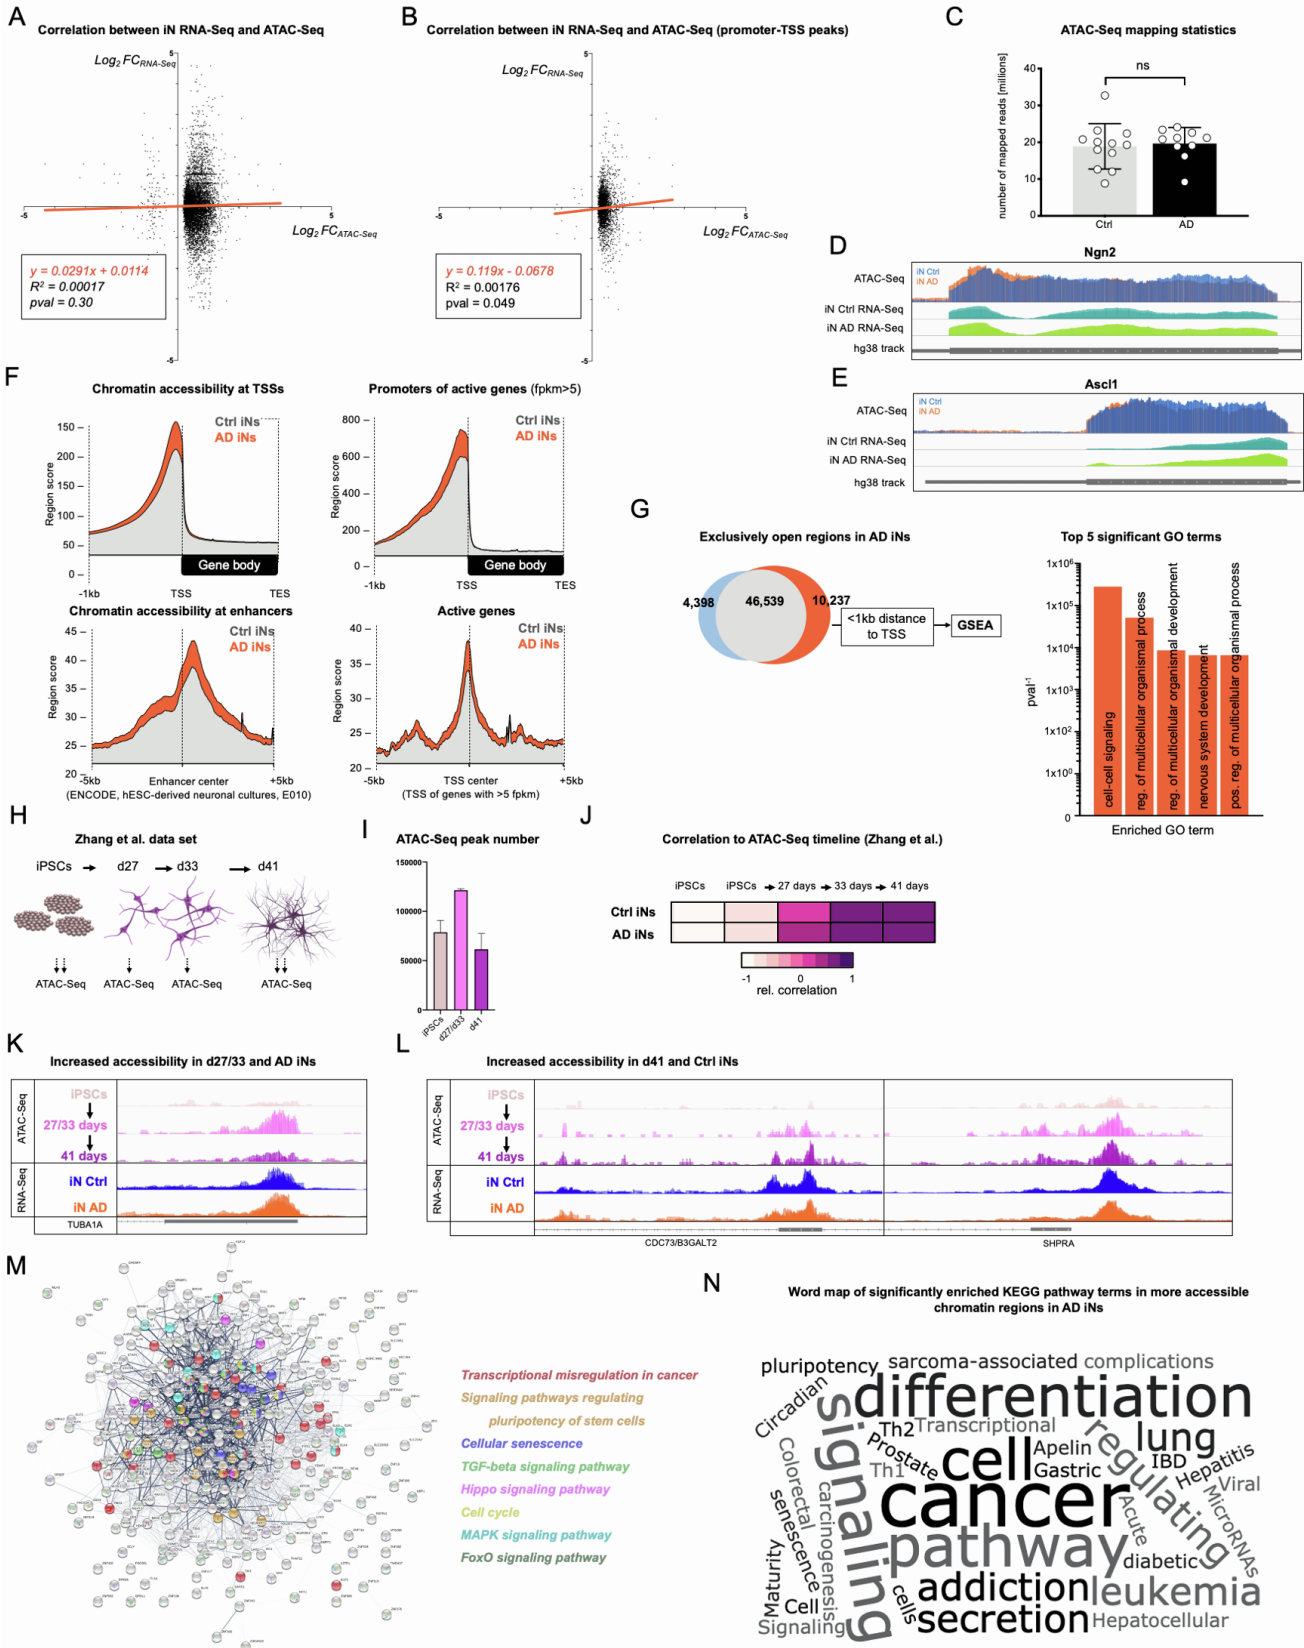

**Supplementary Figure S4. ATAC-Seq analysis of AD iNs, correlation with RNA-Seq, and mapping of the AD iN chromatin landscape to profiles from iPSC-based neuronal differentiation. Related to Fig.6.**

**A-B:** Correlation of Ctrl versus AD iN differential ATAC peak fold changes with differential RNA-Seq expression fold changes. Global (all genomic annotations) chromatin accessibility and gene expression show a positive correlation trend on a gene-by-gene basis (**A**), and promoter-TSS chromatin accessibility significantly correlated with gene expression (**B**).

**C:** No differences in the number of uniquely mapped reads between Ctrl and AD iNs (unpaired t-test). Bars, mean $\pm$ SD.

**D-E:** ATAC-Seq and RNA-Seq tracks for Ngn2 (**D**) and Ascl1 (**E**) transgenes in merged Ctrl and AD iNs indicate no differences between Ctrl and AD iNs in proviral transgene integration and expression.

**F:** Density plot of differential accessibility ATAC-Seq peaks separated by annotation, including TSS, over peak fold change (Ctrl versus AD iNs).

**G:** Chromatin accessibility region scores at ATAC peak regions at all known TSSs (upper left panel), at promoters of active (>5fpm in RNA-Seq) genes (upper right panel), centered around TSS ( $\pm$ 5kb) of neuronal enhancers (ENCODE E010 data set; lower left panel), and centered around the TSSs of active (>5fpm in RNA-Seq) genes. Bar graph shows the top 5 significantly enriched GO terms of promoter-associated peaks exclusively open in AD iNs, but that do not intersect with called peaks in Ctrl iNs. Bars, significance  $pval^{-1}$ .

**H:** Schematic summarizing the data we used from Zhang et al. (Zhang et al., 2018), which performed ATAC-Seq from iPSCs, and iPSC-derived neural cultures from 27, 33 and 41 days of differentiation.

**I:** Significantly more open chromatin regions (peaks) were detected in the more immature 27-day and 33-day cultures, compared to the 41-day and iPSC time points. Bars, mean $\pm$ SD.

**J:** Heatmap showing the higher relative correlation of AD iNs to the less-differentiated 27-days time point, based on relative Pearson correlation values of the global bedgraph peak profiles of our Ctrl and AD iNs to the differentiation time line.

**K-L:** ATAC-Seq tracks of TUBA1A (**K**), a representative gene that shows transient increased accessibility in immature iPSC-neurons and in AD iNs; and tracks of CDC73 and SHRPA (**L**), as representative genes showing a steady increase in accessibility with mature, and lower accessibility in AD iNs than in Ctrl iNs.

**M:** STRING network showing KEGG pathway GSEA of DNA-binding factors that are enriched in chromatin regions differentially accessible in AD iNs. Enriched KEGG pathways that directly relate to cancer-like cellular transformation, senescence, and RNA-Seq gene sets are color-coded in the interaction network, which shows all significant DNA-binding factors detected in our motif analysis.

**N:** Word cloud (wordclouds.com) of significantly enriched KEGG pathways in motif binding factors.

Supplementary Figure S5

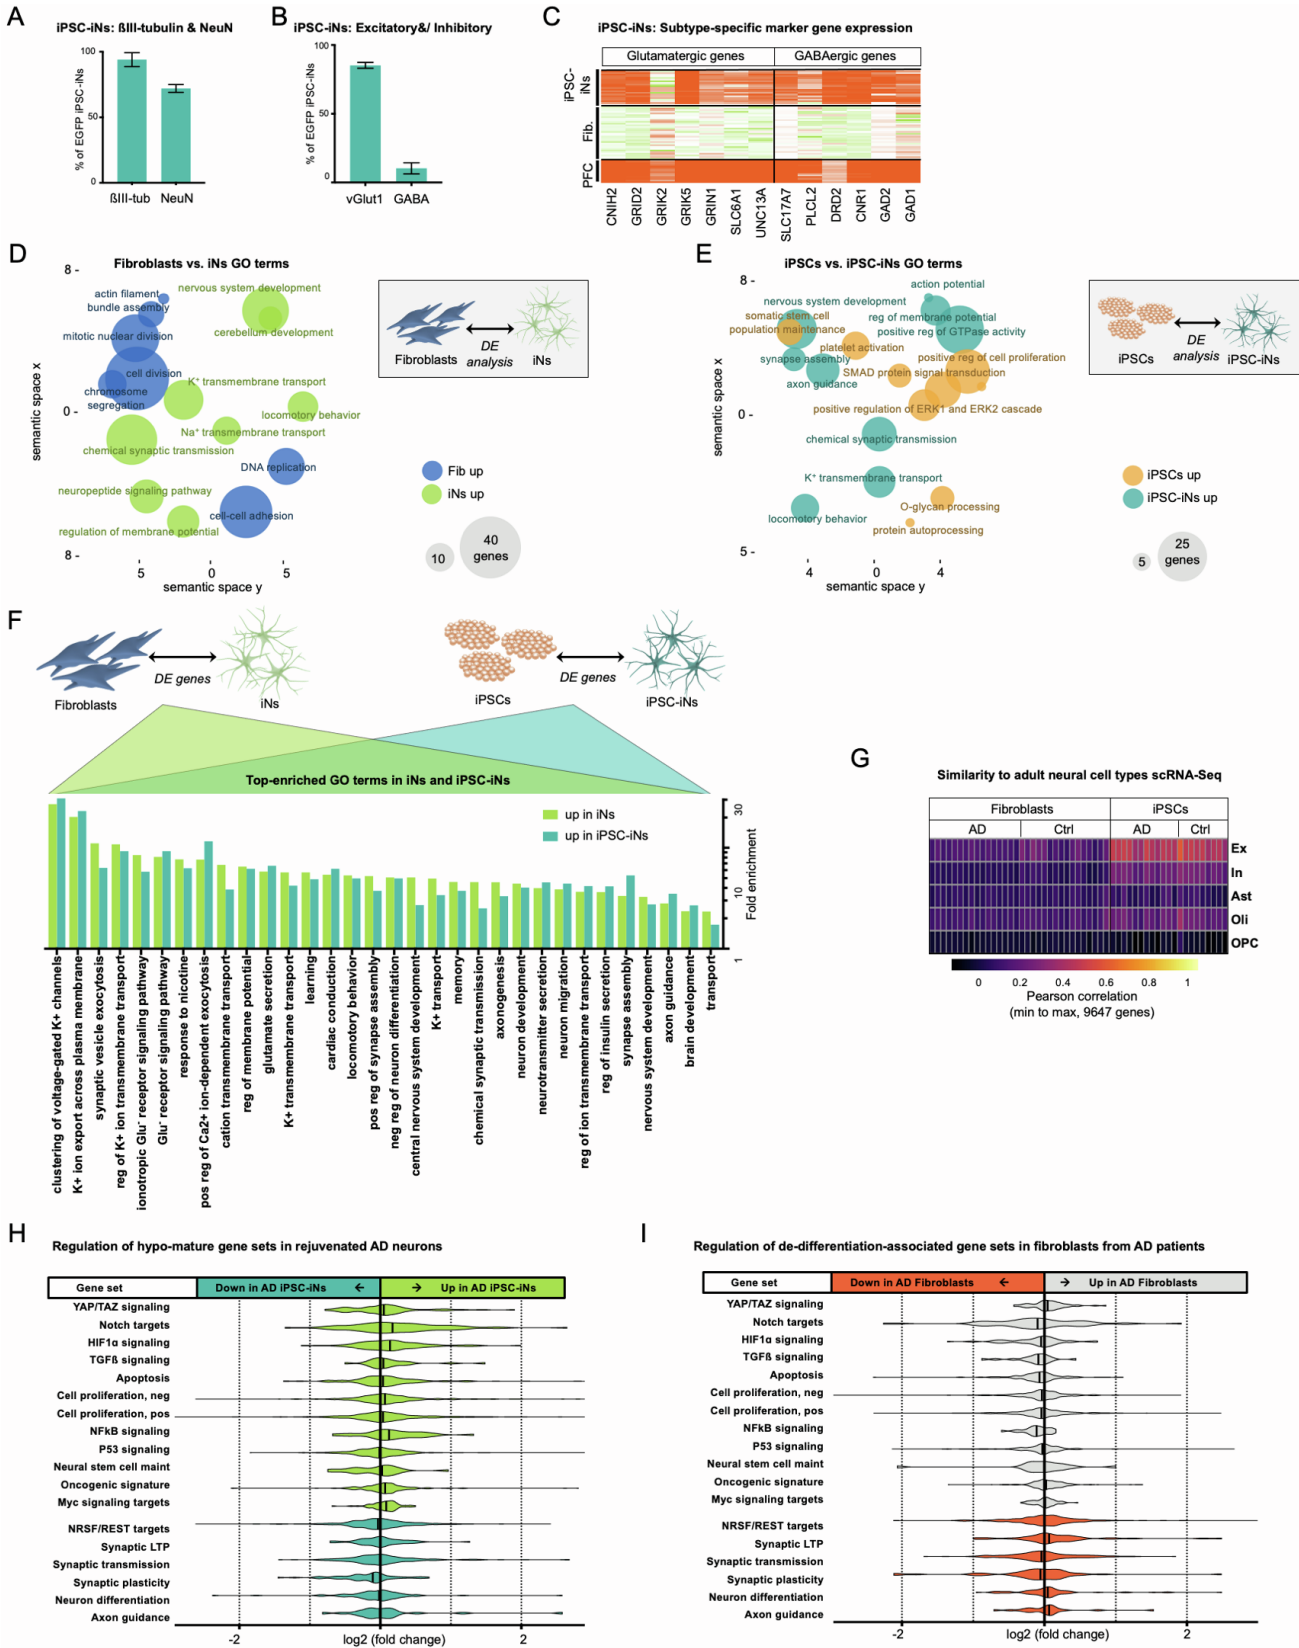

**Supplementary Figure S5. Comparison of iNs and iPSC-iNs by DE analysis and gene set enrichment analyses. Related to Fig.7.**

**A:** Quantification of NeuN,  $\beta$ III-tubulin (A), vGlut1 and GABA-positive (B) immunocytochemistry in FACS-purified iPSC-iN cultures. Bars, mean $\pm$ SD.

**B:** Quantification of immunofluorescence images for vGlut1 and GABA-positive iPSC-iN cultures. Bars, mean $\pm$ SD.

**C:** Expression levels of glutamatergic and GABAergic neuron marker genes in iPSC-iNs compared to fibroblasts and prefrontal cortex (PFC) samples. Green: low; red: high expression.

**D-E:** Mapping of redundancy-trimmed GSEA in semantic REVIGO space. Enriched GO BP terms in significant DE genes between fibroblasts (blue) and iNs (green)(D); and significant DE genes between iPSCs (orange) and iPSC-iNs (petrol)(E). Size of circles corresponds to number of input genes per GO term.

**F:** Comparison of fold enrichment of neural GO BP terms upregulated both between iNs and fibroblasts, and between iPSC-iNs and iPSCs.

**G:** Heatmap showing transcriptome-wide Pearson correlation between iNs and iPSC-iNs and adult human cortex-derived excitatory neurons (Ex), inhibitory (In), astrocytes (Ast), oligodendrocytes (Oli), and oligodendrocyte precursor cells (OPC; from single-nucleus-RNA-Seq data, (Mathys et al., 2019)). All 9,647 genes overlapping between our data, the single-nucleus-RNA-Seq data and BrainSpan datasets were used for the correlation analysis in R).

**H-I:** Violin plots showing gene expression changes between control and AD fibroblasts (H) and iPSC-iNs (I) of selected gene sets also presented in Fig. 3C (mature neuronal gene sets) and Fig. 4D (fate-loss/de-differentiation gene sets) for control and AD iNs. No significant differential expressed genes or any apparent differential regulation of any of these pathways was detected in fibroblasts or iPSC-iNs. The data shown in this plot were used for the paired non-parametric t-tests of the control versus AD log2 fold changes observed iNs to calculate significance over potential donor- and cell-type biases (see Fig. 3C and Fig. 4D).

Supplementary Figure S6

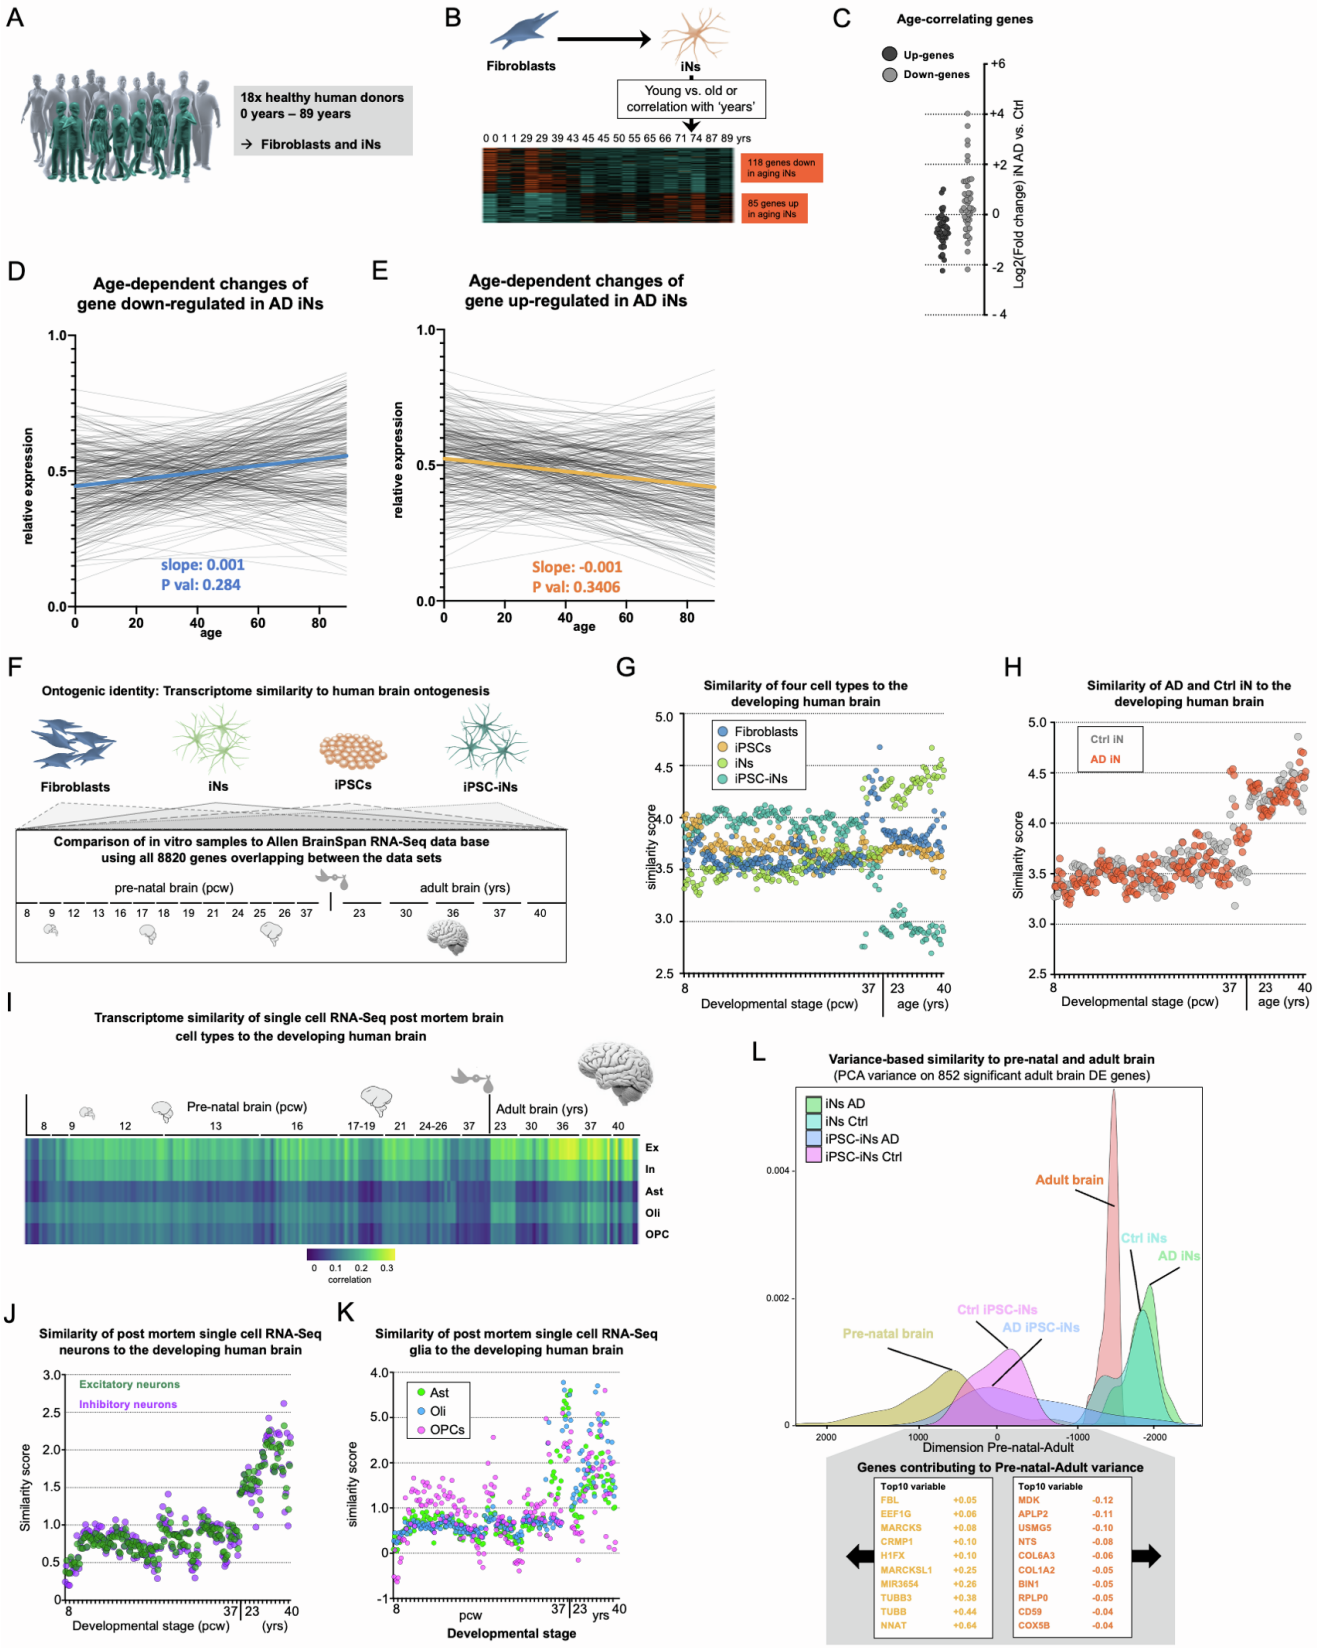

**Supplementary Figure S6. Age-dependent gene expression in Ctrl and AD iNs, and similarity of fibroblasts, iNs, iPSCs and iPSC-iNs to human brain development stages. Related to Fig.7.**

**A:** Schematic depicting cohort of 18 healthy human donors ranging from newborns to 89 years of age from which iNs were generated and subjected to mRNA-Seq (Mertens et al., 2015).

**B:** Differential expression analysis reveals 118 down-regulated and 85 up-regulated aging genes used for the assessment of age-regulated transcriptional changes in AD iNs (Fig. 7J).

**C:** Expression of genes correlating  $|\text{Cor}| > 0.6$  with donor age (Mertens et al., 2015) in control versus AD iNs. Genes that correlate positively with subject age shown in dark gray, negatively correlating genes shown in light gray. Positive values indicate up-regulation in AD iNs over Ctrl. Genes that positively correlate with age in healthy aging appear slightly down-regulated in AD iNs. Each dot represents one gene.

**D-E:** Relative age-dependent expression trend of AD iN up-regulated (**D**) and AD iN down-regulated (**E**) genes in the healthy aging iN cohort. The analysis shows no significant correlation, but a slight inverse trend, with genes down-regulated in AD positively correlating with age and genes up-regulated in AD negatively correlating with age (**E**).

**F:** Ontogenic neural identity was assessed by transcriptional similarity of our 4 cell types to post mortem human brain RNA-Seq data (BrainSpan, n=215 cortical samples).

**G-H:** Normalized transcriptome similarity scores for fibroblast, iNs, iPSCs, and iPSC-iNs (**G**), and for control and AD iNs (**H**) with the 215 cortical samples from BrainSpan (163 fetal and 52 adult samples).

**I:** Heatmap showing transcriptome-wide correlation of adult human cortex-derived excitatory neurons (Ex), neurons (In), astrocytes (Ast), oligodendrocytes (Oli), and oligodendrocyte precursor cells (OPC; from single-nucleus-RNA-Seq data (Mathys et al., 2019) to cortical samples (n=215) of the Allen BrainSpan data set. All 9,647 genes overlapping between our data, the single-nucleus-RNA-Seq data, and the BrainSpan data sets were used for correlation.

**J-K:** Normalized transcriptome similarity scores for adult human cortex-derived excitatory neurons (Ex) and inhibitory neurons (In) (**D**), and glial cell types (**E**) astrocytes (Ast), oligodendrocytes (Oli), oligodendrocyte precursor cells (OPC; from single-nucleus-RNA-Seq data (Mathys et al., 2019) with the 163 fetal developmental and 52 adult cortical BrainSpan samples.

**L:** Density plot showing the localizations of control and AD iN (n=28), iPSC-iN (n=20) samples, and BrainSpan pre-natal (n=163) and adult (n=52) cortical samples along pre-natal-adult variance dimension. Pre-natal-adult variance is based on PCA of 852 genes overrepresented in adult samples over fetal samples of BrainSpan transcriptome atlas and separates fetal from adult brain samples, and iN and iPSC-iN co-localize with adult and fetal samples, respectively. Boxes below show the top 10 genes with the highest positive and negative loadings in the Pre-natal-adult principal component.



## Supplementary Figure S7

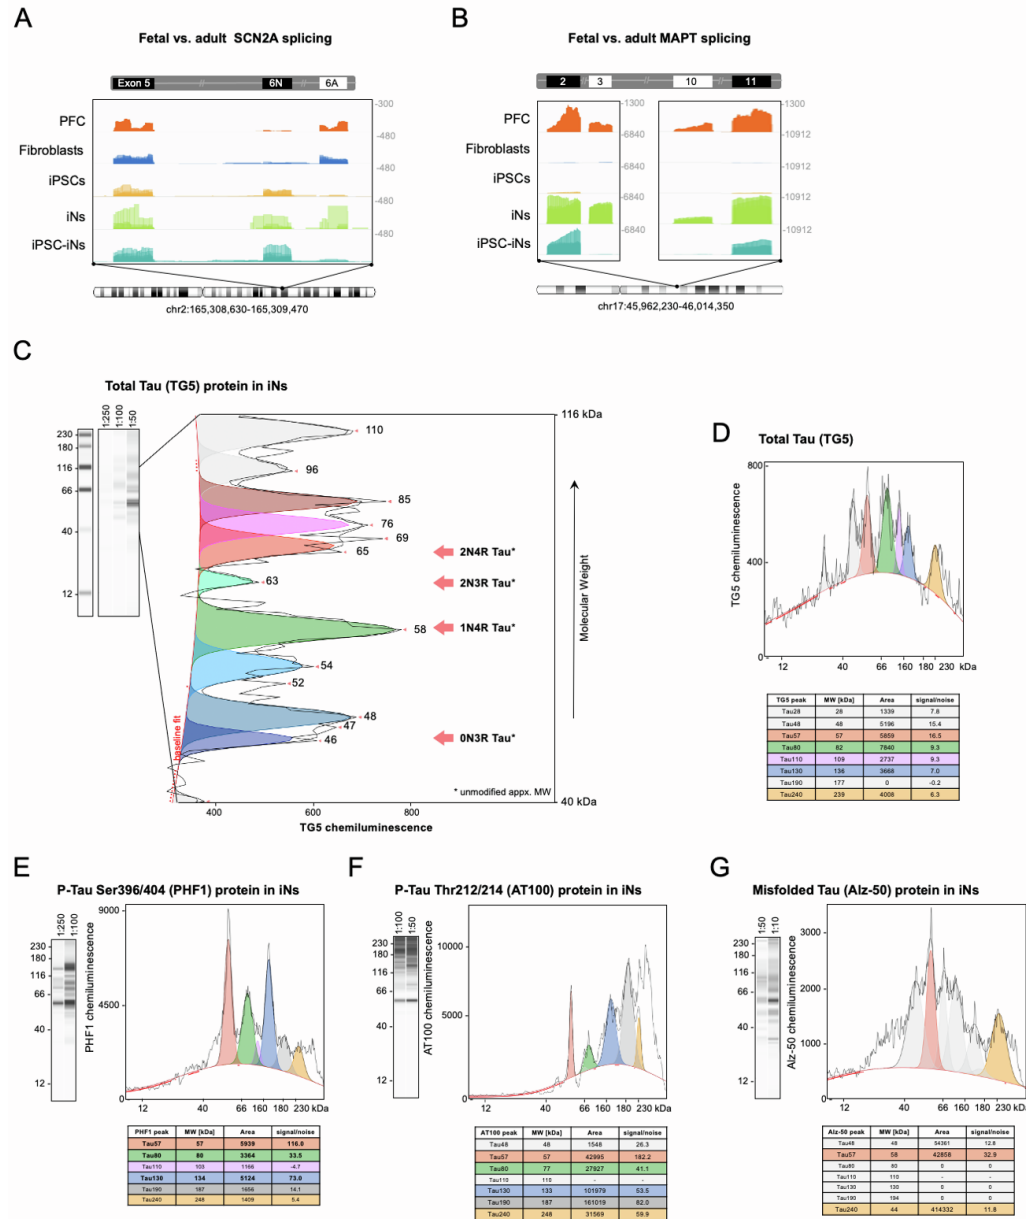

## Supplementary Figure S7. Adult-like splicing patterns and MAPT protein variants in iNs. Related to Fig.7.

**A-B:** Genome browser tracks of mRNA-Seq data from merged fibroblasts, iNs, iPSCs and iPSC-iNs and around the fetal (6N) and adult (6A) exon of the SCN2A gene (**A**), and of the adult-specific spliced exons 3 and 10 of the MAPT gene (**B**). Scale values on right y-axis represent number of aligned reads per cell type. PFC, post mortem pre-frontal cortex samples (Mertens et al., 2015).

**C-D:** Capillary Western blot (ProteinSimple) analysis for total-Tau (TG5 antibody) shows a wide distribution of Tau species in iNs. The pseudo-gel (**C**; left) and electropherogram (**C**; main box) views show different Tau species, including variants at 65 kDa and over, which correspond to the size of the 2N4R isoform and modified version of it. TG5 electropherogram also shows larger peaks up to 230 kDa (**D**).

**E-G:** Capillary Western blot analysis for phosho-Tau (PHF1, pSer396/404 (**E**); AT100, pThr212/214 (**F**); and Alz-50, misfolded Tau (**G**) antibodies). The pseudo-gel (left) and electropherogram (main boxes) views show that the antibodies detect different Tau species, with different affinities to different species, but also many of the same peaks were detected. Coloring of peaks is used to make the same peaks recognizable throughout the figure, and the tables (bottom) list molecular weights (MW), signal strength (area under the curve), and signal-to-noise ratios (S/N >20 typically considered significant) for each peak following background fit (red line).

**Supplementary Table S1**

Table of all human fibroblast samples used in this study. Related to Fig.1.

| ID    | Group   | fAD mutation | Age (of biopsy) | Gender | Clinical Dx        | Dx data                 | APOE  |
|-------|---------|--------------|-----------------|--------|--------------------|-------------------------|-------|
| A84   | control | no           | 87              | M      | non-demented       | Clinical summary report | 3...3 |
| A29   | control | no           | 89              | M      | non-demented       | Clinical summary report | 3...4 |
| A03   | control | no           | 66              | M      | non-demented       | Clinical summary report | 3...3 |
| 27    | control | no           | 86              | M      | non-demented       | ADRC study participant  | 2...3 |
| 8011  | control | no           | 85              | M      | non-demented       | ADRC study participant  | 3...3 |
| 14096 | control | no           | 69              | M      | non-demented       | ADRC study participant  | 3...3 |
| 40    | control | no           | 84              | M      | non-demented       | ADRC study participant  | 3...3 |
| 2785  | control | no           | 78              | F      | non-demented       | ADRC study participant  | 3...4 |
| 8150  | control | no           | 65              | M      | non-demented       | ADRC study participant  | 3...3 |
| 3383  | control | no           | 84              | F      | non-demented       | ADRC study participant  | 3...3 |
| 3056  | control | no           | 85              | M      | non-demented       | ADRC study participant  | 3...3 |
| 14095 | control | no           | 75              | F      | non-demented       | ADRC study participant  | 3...4 |
| E30   | control | no           | 71              | M      | non-demented       | Clinical summary report | 4...4 |
| 8072  | control | no           | 76              | F      | non-demented       | ADRC study participant  | 3...4 |
| 8078  | control | no           | 87              | M      | non-demented       | ADRC study participant  | 3...3 |
| 8094  | control | no           | 82              | M      | non-demented       | ADRC study participant  | 3...4 |
| 3367  | control | no           | 79              | M      | non-demented       | ADRC study participant  | 2...3 |
| 2608  | control | no           | 67              | F      | non-demented       | ADRC study participant  | 4...4 |
| 8173  | control | no           | 81              | M      | non-demented       | ADRC study participant  | 3...3 |
| 8149  | AD      | no           | 79              | F      | demented, prob. AD | ADRC study participant  | 3...3 |
| 3093  | AD      | no           | 81              | M      | demented, prob. AD | ADRC study participant  | 3...3 |
| 2991  | AD      | no           | 89              | M      | demented, prob. AD | ADRC study participant  | 3...3 |
| 8097  | AD      | no           | 78              | M      | demented, prob. AD | ADRC study participant  | 3...3 |
| 2800  | AD      | no           | 80              | M      | demented, prob. AD | ADRC study participant  | 3...4 |
| 654   | AD      | no           | 88              | F      | demented, prob. AD | ADRC study participant  | 3...3 |
| 3053  | AD      | no           | 82              | M      | demented, prob. AD | ADRC study participant  | 4...4 |
| 3113  | AD      | no           | 83              | M      | demented, prob. AD | ADRC study participant  | 2...3 |
| 3131  | AD      | no           | 80              | F      | demented, prob. AD | ADRC study participant  | 3...4 |
| 8020  | AD      | no           | 76              | F      | demented, prob. AD | ADRC study participant  | 3...4 |
| 8175  | AD      | no           | 83              | M      | demented, prob. AD | ADRC study participant  | 3...3 |
| 3158  | AD      | no           | 75              | F      | demented, prob. AD | ADRC study participant  | 3...3 |
| 3121  | AD      | no           | 75              | F      | demented, prob. AD | ADRC study participant  | 3...3 |
| KP    | AD      | APPSWE       | 53              | M      | familial AD        | Clinical summary report | 3...3 |
| HR    | AD      | APPV717F     | 57              | M      | familial AD        | Clinical summary report | 3...3 |
| 840C  | AD      | PS1A246E     | 56              | M      | familial AD        | Clinical summary report | 3...3 |
| Hans  | AD      | PS1 mut      | 41              | M      | familial AD        | Clinical summary report |       |
| A54   | young   | no           | 29              | M      | non-demented       | Clinical summary report |       |
| E1    | young   | no           | 29              | F      | non-demented       | Clinical summary report |       |
| E4    | young   | no           | 43              | M      | non-demented       | Clinical summary report |       |

**Clinical follow-up of sporadic AD subjects (available only for ADRC participants):**

Autopsy of the following subjects confirmed classical AD pathology (amyloid plaques Thal stage 5 and/or extensive neuritic plaques, and Braak stage 6 neurofibrillary tau pathology): 8149, 3093, 8097, 8020, 8175, and 3158.

Autopsy for subject 654 confirmed AD with amyloid, but died at a stage of moderate dementia with Braak stage 3 tau pathology.

Autopsy for subjects 2800, 3113, 2991 and 3121 showed hippocampal atrophy with signs for hippocampal sclerosis and TDP43 inclusions, and only partially showed significant amyloid or tau pathology. These AD cases thus had neurodegenerative co-morbidities and can be classified as non-classical AD cases that clinically mimicked classical AD.

No autopsy was performed for subject 3131. Three years of follow-up showed clinical progression with severe memory loss, worsening of other cognitive domains, and severe dementia. CSF biomarkers showed low A-beta42, high tau and high P-tau, consistent with AD. MRI showed hippocampal atrophy, and hippocampal sclerosis co-morbidity remains possible.

No autopsy was performed for subject 3053. Eight years of follow-up showed clinical progression with severe memory loss, worsening of other cognitive domains, and severe dementia. MRI showed hippocampal atrophy, consistent with AD.



Supplementary Table S2

Table of control and AD subjects assessed in this study for each experiment. Related to all Figures.

| ID                 | Group   | RNA-Seq |         |        |         | DNAm EPIC |       | ATAC-Seq |    |    |    |
|--------------------|---------|---------|---------|--------|---------|-----------|-------|----------|----|----|----|
|                    |         | Fib     | IN      | IPSC   | IPSC-IN | Fib       | IN    | Fib      | IN | IN | IN |
| A84                | control | X       | X       | X      | X       |           |       |          |    | X  | X  |
| A29                | control | X       | X       | X      | X       |           |       |          |    | X  | X  |
| A03                | control | X       | X       | X      | X       |           |       |          |    |    |    |
| 27                 | control | X       | X       | X      | X       |           |       |          |    | X  | X  |
| 8011               | control | X       | X       | X      | X       | X         | X     | X        | X  |    |    |
| 14096              | control | X       | X       | X      | X       |           |       |          |    | X  | X  |
| 40                 | control | X       | X       | X      | X       |           |       |          |    | X  | X  |
| 2785               | control | X       | X       | X      | X       | X         | X     | X        | X  | X  | X  |
| 8150               | control | X       | X       | X      | X       | X         | X     | X        | X  | X  | X  |
| 3383               | control | X       | X       | X      | X       |           |       |          |    |    |    |
| 3056               | control | X       | X       | X      | X       |           |       |          |    |    |    |
| 14095              | control | X       | X       | X      | X       | X         | X     | X        | X  | X  | X  |
| E30                | control | X       | X       | X      | X       | X         | X     | X        | X  | X  | X  |
| 8072               | control |         |         |        |         |           |       |          |    |    |    |
| 8078               | control | X       | X       |        |         | X         | X     |          |    | X  | X  |
| 8094               | control |         |         |        |         | X         | X     |          |    |    |    |
| 3367               | control | X       | X       |        |         | X         | X     |          |    |    |    |
| 2608               | control | X       | X       |        |         |           |       |          |    | X  | X  |
| 8173               | control | X       | X       |        |         |           |       |          |    | X  | X  |
| 8149               | AD      | X       | X       | X      | X       | X         | X     | X        | X  |    |    |
| 3093               | AD      | X       | X       | X      | X       | X         | X     |          |    | X  | X  |
| 2991               | AD      | X       | X       | X      | X       |           |       |          |    |    |    |
| 8097               | AD      | X       | X       | X      | X       |           |       |          |    | X  | X  |
| 2800               | AD      | X       | X       | X      | X       |           |       |          |    | X  | X  |
| 654                | AD      | X       | X       | X      | X       | X         | X     |          |    | X  | X  |
| 3053               | AD      | X       | X       | X      | X       | X         | X     | X        | X  | X  | X  |
| 3113               | AD      | X       | X       | X      | X       | X         | X     | X        | X  | X  | X  |
| 3131               | AD      | X       | X       |        |         | X         | X     | X        | X  | X  | X  |
| 8020               | AD      | X       | X       | X      | X       | X         | X     | X        | X  | X  | X  |
| 8175               | AD      | X       | X       |        |         |           |       |          |    | X  | X  |
| 3158               | AD      | X       | X       | X      | X       | X         | X     | X        | X  | X  | X  |
| 3121               | AD      | X       | X       | X      | X       | X         | X     |          |    | X  | X  |
| KP                 | AD      | X       | X       | X      | X       |           |       |          |    |    |    |
| HR                 | AD      | X       | X       | X      | X       |           |       |          |    | X  | X  |
| 840C               | AD      | X       | X       | X      | X       |           |       |          |    |    |    |
| Hans               | AD      |         |         |        |         |           |       |          |    |    |    |
| A54                | young   | *       | *       | *      | *       |           |       |          |    |    |    |
| E1                 | young   | *       | *       | *      | *       |           |       |          |    |    |    |
| E4                 | young   | *       | *       | *      | *       |           |       |          |    |    |    |
| n (Ctrl versus AD) |         | 16 v 16 | 15 v 13 | 9 v 12 | 8 v 12  | 8 v 8     | 8 v 8 | 11 v 10  |    |    |    |

\* assessed also in Mertens et al. Cell Stem Cell 2015

X assessed in this study

## Supplementary Table S5

Table of enriched GO terms in AD iNs. Related to Fig.3, Fig.4.

| Enriched GO terms in down-regulated genes in AD iNs |                                               |          |              | Enriched GO terms in up-regulated genes in AD iNs |                                                                  |          |              |
|-----------------------------------------------------|-----------------------------------------------|----------|--------------|---------------------------------------------------|------------------------------------------------------------------|----------|--------------|
| Term                                                | description                                   | PValue   | Fold Enrich. | Term                                              | description                                                      | PValue   | Fold Enrich. |
| GO:0006351                                          | transcription, DNA-templated                  | 8.72E-09 | 1.59         | GO:0001666                                        | response to hypoxia                                              | 6.95E-09 | 3.61         |
| GO:0006355                                          | regulation of transcription, DNA-templated    | 1.50E-08 | 1.68         | GO:0055114                                        | oxidation-reduction process                                      | 1.63E-07 | 2.10         |
| GO:0043547                                          | positive regulation of GTPase activity        | 2.07E-05 | 1.90         | GO:0001525                                        | angiogenesis                                                     | 1.74E-07 | 2.98         |
| GO:0048511                                          | rhythmic process                              | 3.14E-05 | 4.77         | GO:0008285                                        | negative regulation of cell proliferation                        | 2.27E-07 | 2.38         |
| GO:0051056                                          | regulation of small GTPase mediated           | 4.89E-05 | 3.04         | GO:0045766                                        | positive regulation of angiogenesis                              | 3.28E-07 | 3.91         |
| GO:0035023                                          | regulation of Rho protein signal              | 3.47E-04 | 3.45         | GO:0022617                                        | extracellular matrix disassembly                                 | 1.86E-06 | 4.51         |
| GO:0061003                                          | positive regulation of dendritic spine        | 4.37E-04 | 8.59         | GO:0006954                                        | inflammatory response                                            | 7.71E-06 | 2.20         |
| GO:0007399                                          | nervous system development                    | 9.36E-04 | 2.02         | GO:0007165                                        | signal transduction                                              | 1.16E-05 | 1.60         |
| GO:0007411                                          | axon guidance                                 | 0.0012   | 2.43         | GO:0030335                                        | positive regulation of cell migration                            | 1.60E-05 | 2.79         |
| GO:0035556                                          | intracellular signal transduction             | 0.0012   | 1.81         | GO:0042060                                        | wound healing                                                    | 1.76E-05 | 4.02         |
| GO:0007626                                          | locomotory behavior                           | 0.0017   | 3.07         | GO:0045429                                        | positive regulation of nitric oxide biosynthetic process         | 2.17E-05 | 5.48         |
| GO:0006491                                          | N-glycan processing                           | 0.0019   | 6.44         | GO:0007568                                        | aging                                                            | 2.82E-05 | 2.86         |
| GO:0051965                                          | positive regulation of synapse assembly       | 0.0022   | 3.46         | GO:0008284                                        | positive regulation of cell proliferation                        | 3.46E-05 | 1.98         |
| GO:0007420                                          | brain development                             | 0.0034   | 2.15         | GO:0036327                                        | cell adhesion mediated by integrin                               | 3.51E-05 | 10.00        |
| GO:0001764                                          | neurite migration                             | 0.0035   | 2.66         | GO:0071549                                        | cellular response to dexamethasone stimulus                      | 3.86E-05 | 6.65         |
| GO:0007158                                          | neuron cell-cell adhesion                     | 0.0054   | 6.71         | GO:0008360                                        | regulation of cell shape                                         | 9.04E-05 | 2.91         |
| GO:0003222                                          | ventricular trabecula myocardium              | 0.0054   | 6.71         | GO:0043066                                        | negative regulation of apoptotic process                         | 9.07E-05 | 1.93         |
| GO:0032012                                          | regulation of ARF protein signal              | 0.0054   | 6.71         | GO:0042493                                        | response to drug                                                 | 9.15E-05 | 2.18         |
| GO:0060384                                          | innervation                                   | 0.0084   | 5.96         | GO:0050731                                        | positive regulation of peptidyl-tyrosine phosphorylation         | 1.01E-04 | 3.66         |
| GO:0007417                                          | central nervous system development            | 0.0100   | 2.33         | GO:0030198                                        | extracellular matrix organization                                | 1.25E-04 | 2.51         |
| GO:0007018                                          | microtubule-based movement                    | 0.0127   | 2.65         | GO:0036499                                        | PERK-mediated unfolded protein response                          | 1.31E-04 | 10.71        |
| GO:0043065                                          | positive regulation of apoptotic process      | 0.0134   | 1.72         | GO:0030512                                        | negative regulation of transforming growth factor beta receptor  | 1.63E-04 | 4.02         |
| GO:0055117                                          | regulation of cardiac muscle contraction      | 0.0148   | 5.11         | GO:0030514                                        | negative regulation of BMP signaling pathway                     | 1.94E-04 | 4.76         |
| GO:0010977                                          | negative regulation of neuron projection      | 0.0155   | 3.42         | GO:0001843                                        | neural tube closure                                              | 2.19E-04 | 3.62         |
| GO:0007156                                          | homophilic cell adhesion via plasma           | 0.0161   | 2.54         | GO:0003246                                        | response to lipopolysaccharide                                   | 2.35E-04 | 2.61         |
| GO:0000226                                          | microtubule cytoskeleton organization         | 0.0170   | 2.72         | GO:0001938                                        | positive regulation of endothelial cell proliferation            | 3.24E-04 | 3.72         |
| GO:0002027                                          | regulation of heart rate                      | 0.0173   | 3.90         | GO:0071407                                        | cellular response to organic cyclic compound                     | 3.62E-04 | 3.99         |
| GO:0030036                                          | actin cytoskeleton organization               | 0.0181   | 2.15         | GO:0030109                                        | collagen fibril organization                                     | 3.66E-04 | 4.94         |
| GO:0098735                                          | positive regulation of the force of heart     | 0.0197   | 12.88        | GO:0006564                                        | L-serine biosynthetic process                                    | 3.90E-04 | 21.42        |
| GO:1904885                                          | beta-catenin destruction complex assembly     | 0.0197   | 12.88        | GO:0031663                                        | lipopolysaccharide-mediated signaling pathway                    | 5.65E-04 | 5.35         |
| GO:0090102                                          | cochlea development                           | 0.0235   | 4.47         | GO:0045599                                        | negative regulation of fat cell differentiation                  | 6.21E-04 | 4.59         |
| GO:0090314                                          | positive regulation of protein targeting to   | 0.0235   | 4.47         | GO:0070059                                        | intrinsic apoptotic signaling pathway in response to endoplasmic | 6.88E-04 | 5.19         |
| GO:0007422                                          | peripheral nervous system development         | 0.0235   | 4.47         | GO:0030574                                        | collagen catabolic process                                       | 7.07E-04 | 3.68         |
| GO:0047496                                          | vesicle transport along microtubule           | 0.0248   | 6.14         | GO:0034142                                        | tol-like receptor 4 signaling pathway                            | 0.0011   | 7.14         |
| GO:0000086                                          | G2/M transition of mitotic cell cycle         | 0.0261   | 2.04         | GO:0048469                                        | cell maturation                                                  | 0.0012   | 4.76         |
| GO:0048313                                          | dendrite morphogenesis                        | 0.0273   | 3.48         | GO:0001224                                        | tol-like receptor signaling pathway                              | 0.0013   | 2.63         |
| GO:0070585                                          | protein localization to mitochondrion         | 0.0286   | 10.74        | GO:0035987                                        | endothelial cell differentiation                                 | 0.0013   | 5.55         |
| GO:0006198                                          | cAMP catabolic process                        | 0.0300   | 5.73         | GO:0033138                                        | positive regulation of neptidyl-serine phosphorylation           | 0.0014   | 3.37         |
| GO:0010667                                          | negative regulation of cardiac muscle cell    | 0.0300   | 5.73         | GO:0043536                                        | positive regulation of blood vessel endothelial cell migration   | 0.0015   | 6.76         |
| GO:0086005                                          | ventricular cardiac muscle cell action        | 0.0300   | 5.73         | GO:0009612                                        | response to mechanical stimulus                                  | 0.0015   | 3.63         |
| GO:0007268                                          | chemical synaptic transmission                | 0.0322   | 1.70         | GO:0032689                                        | negative regulation of interferon-gamma production               | 0.0016   | 5.35         |
| GO:0006811                                          | ion transport                                 | 0.0346   | 2.03         | GO:0042517                                        | positive regulation of tyrosine phosphorylation of Stat3 protein | 0.0017   | 4.51         |
| GO:0007029                                          | endoplasmic reticulum organization            | 0.0348   | 3.98         | GO:0060394                                        | negative regulation of pathway-restricted SMAD protein           | 0.0017   | 8.92         |
| GO:0010569                                          | regulation of double-strand break repair via  | 0.0357   | 5.37         | GO:0045669                                        | positive regulation of osteoblast differentiation                | 0.0017   | 3.57         |
| GO:0001759                                          | positive regulation of neural precursor cell  | 0.0357   | 5.37         | GO:0000302                                        | response to reactive oxygen species                              | 0.0019   | 4.39         |
| GO:0034220                                          | ion transmembrane transport                   | 0.0364   | 1.74         | GO:0002062                                        | chondrocyte differentiation                                      | 0.0019   | 4.39         |
| GO:0000096                                          | positive regulation of Wnt signaling          | 0.0388   | 9.20         | GO:0050729                                        | positive regulation of inflammatory response                     | 0.0020   | 3.23         |
| GO:0030913                                          | pancreatic islet assembly                     | 0.0388   | 9.20         | GO:0060325                                        | face morphogenesis                                               | 0.0023   | 5.00         |
| GO:0010882                                          | regulation of cardiac muscle contraction by   | 0.0388   | 9.20         | GO:0071222                                        | cellular response to lipopolysaccharide                          | 0.0023   | 2.65         |
| GO:0006887                                          | exocytosis                                    | 0.0389   | 2.33         | GO:0002526                                        | acute inflammatory response                                      | 0.0024   | 8.24         |
| GO:0019228                                          | neuronal action potential                     | 0.0391   | 3.83         | GO:0006693                                        | prostaglandin metabolic process                                  | 0.0024   | 8.24         |
| GO:0000145                                          | regulation of cell motility                   | 0.0391   | 3.83         | GO:0042127                                        | regulation of cell proliferation                                 | 0.0026   | 2.20         |
| GO:0032526                                          | response to retinoic acid                     | 0.0404   | 3.14         | GO:0010628                                        | positive regulation of gene expression                           | 0.0028   | 1.96         |
| GO:1901216                                          | positive regulation of neuron death           | 0.0419   | 5.05         | GO:0007566                                        | embryo implantation                                              | 0.0030   | 4.68         |
| GO:1903779                                          | regulation of cardiac conduction              | 0.0449   | 2.68         | GO:0008217                                        | regulation of blood pressure                                     | 0.0031   | 3.30         |
| GO:0007026                                          | chromatin remodeling                          | 0.0465   | 2.25         | GO:0008642                                        | negative regulation of skeletal muscle tissue development        | 0.0031   | 12.24        |
| GO:0000338                                          | neurotrophin receptor signaling pathway       | 0.0465   | 2.25         | GO:0001649                                        | osteoblast differentiation                                       | 0.0033   | 2.68         |
| GO:0007612                                          | learning                                      | 0.0483   | 2.64         | GO:0070374                                        | positive regulation of ERK1 and ERK2 cascade                     | 0.0034   | 2.20         |
| GO:0007413                                          | axonal fasciculation                          | 0.0486   | 4.77         | GO:0046718                                        | viral entry into host cell                                       | 0.0039   | 2.95         |
| GO:0045773                                          | positive regulation of axon extension         | 0.0487   | 3.58         | GO:0001570                                        | vasculogenesis                                                   | 0.0042   | 3.44         |
| GO:0016082                                          | synaptic vesicle priming                      | 0.0502   | 8.05         | GO:0044598                                        | doxorubicin metabolic process                                    | 0.0047   | 10.71        |
| GO:0006661                                          | phosphatidylinositol biosynthetic process     | 0.0518   | 2.59         | GO:0044597                                        | daunorubicin metabolic process                                   | 0.0047   | 10.71        |
| GO:0035725                                          | sodium ion transmembrane transport            | 0.0527   | 2.35         | GO:0007265                                        | Ras protein signal transduction                                  | 0.0051   | 3.06         |
| GO:0010976                                          | positive regulation of neuron projection      | 0.0549   | 2.17         | GO:0051897                                        | positive regulation of protein kinase B signaling                | 0.0056   | 2.80         |
| GO:0010765                                          | positive regulation of sodium ion transport   | 0.0557   | 4.52         | GO:0031100                                        | organ regeneration                                               | 0.0058   | 3.65         |
| GO:0007026                                          | negative regulation of microtubule            | 0.0557   | 4.52         | GO:0043406                                        | positive regulation of MAP kinase activity                       | 0.0058   | 3.36         |
| GO:0008045                                          | motor neuron axon guidance                    | 0.0557   | 4.52         | GO:0030097                                        | hemopoiesis                                                      | 0.0059   | 3.27         |
| GO:0010881                                          | regulation of cardiac muscle contraction by   | 0.0557   | 4.52         | GO:0009409                                        | response to cold                                                 | 0.0059   | 4.16         |
| GO:1990138                                          | neuron projection extension                   | 0.0557   | 4.52         | GO:0048010                                        | vascular endothelial growth factor receptor signaling pathway    | 0.0061   | 2.97         |
| GO:0000266                                          | mitochondrial fission                         | 0.0557   | 4.52         | GO:0048661                                        | positive regulation of smooth muscle cell proliferation          | 0.0064   | 3.21         |
| GO:0000122                                          | negative regulation of transcription from     | 0.0570   | 1.31         | GO:0051603                                        | proteolysis involved in cellular protein catabolic process       | 0.0065   | 3.57         |
| GO:0045732                                          | positive regulation of protein catabolic      | 0.0594   | 2.51         | GO:0006629                                        | lipid metabolic process                                          | 0.0067   | 2.18         |
| GO:0051591                                          | response to cAMP                              | 0.0613   | 2.80         | GO:0032722                                        | positive regulation of chemokine production                      | 0.0069   | 6.30         |
| GO:0061314                                          | Notch signaling involved in heart             | 0.0626   | 7.16         | GO:0042448                                        | progesterone metabolic process                                   | 0.0069   | 9.52         |
| GO:0032866                                          | regulation of microtubule-based process       | 0.0626   | 7.16         | GO:2000737                                        | negative regulation of stem cell differentiation                 | 0.0069   | 9.52         |
| GO:0035095                                          | behavioral response to nicotine               | 0.0626   | 7.16         | GO:0001657                                        | ureteric bud development                                         | 0.0078   | 3.95         |
| GO:1903821                                          | regulation of cellular protein localization   | 0.0626   | 7.16         | GO:0030324                                        | lung development                                                 | 0.0087   | 2.82         |
| GO:0006028                                          | regulation of canonical Wnt signaling         | 0.0634   | 4.29         | GO:0001569                                        | patterning of blood vessels                                      | 0.0088   | 4.59         |
| GO:0045892                                          | negative regulation of transcription, DNA-    | 0.0637   | 1.38         | GO:0042542                                        | response to hydrogen peroxide                                    | 0.0090   | 3.36         |
| GO:0043647                                          | inositol phosphate metabolic process          | 0.0661   | 2.74         | GO:0019371                                        | cyclooxygenase pathway                                           | 0.0095   | 8.57         |
| GO:0007264                                          | small GTPase mediated signal transduction     | 0.0688   | 1.57         | GO:0002675                                        | positive regulation of acute inflammatory response               | 0.0095   | 8.57         |
| GO:0008286                                          | insulin receptor signaling pathway            | 0.0704   | 2.20         | GO:0048662                                        | negative regulation of smooth muscle cell proliferation          | 0.0102   | 4.43         |
| GO:0050769                                          | positive regulation of neurogenesis           | 0.0715   | 4.09         | GO:0035019                                        | somatic stem cell population maintenance                         | 0.0104   | 2.97         |
| GO:2000727                                          | positive regulation of cardiac muscle cell    | 0.0759   | 6.44         | GO:0007179                                        | transforming growth factor beta receptor signaling pathway       | 0.0105   | 2.56         |
| GO:0046785                                          | microtubule polymerization                    | 0.0759   | 6.44         | GO:0010951                                        | negative regulation of endopeptidase activity                    | 0.0109   | 2.30         |
| GO:0033148                                          | positive regulation of intracellular estrogen | 0.0759   | 6.44         | GO:0042981                                        | regulation of apoptotic process                                  | 0.0110   | 1.91         |
| GO:0042752                                          | regulation of circadian rhythm                | 0.0763   | 2.63         | GO:0007037                                        | platelet aggregation                                             | 0.0112   | 3.66         |
| GO:0006078                                          | regulation of postsynaptic membrane           | 0.0800   | 3.90         | GO:0032526                                        | response to retinoic acid                                        | 0.0112   | 3.66         |
| GO:0042059                                          | negative regulation of epidermal growth       | 0.0845   | 2.98         | GO:0007264                                        | small GTPase mediated signal transduction                        | 0.0115   | 1.83         |
| GO:0006890                                          | retrograde vesicle-mediated transport,        | 0.0868   | 2.09         | GO:0007507                                        | heart development                                                | 0.0118   | 1.99         |
| GO:0019722                                          | calcium-mediated signaling                    | 0.0873   | 2.53         | GO:0071395                                        | cellular response to isosmotic acid stimulus                     | 0.0122   | 16.06        |
| GO:0030335                                          | positive regulation of cell migration         | 0.0882   | 1.63         | GO:1903553                                        | positive regulation of extracellular exosome assembly            | 0.0122   | 16.06        |
| GO:0006469                                          | negative regulation of protein kinase         | 0.0898   | 1.95         | GO:0010716                                        | negative regulation of extracellular matrix disassembly          | 0.0122   | 16.06        |
| GO:0033169                                          | histone H3-K9 demethylation                   | 0.0900   | 5.86         | GO:0070671                                        | response to interleukin-12                                       | 0.0122   | 16.06        |
| GO:0045624                                          | positive regulation of T-helper cell          | 0.0909   | 21.47        | GO:0000122                                        | negative regulation of transcription from RNA polymerase II      | 0.0123   | 1.43         |
| GO:0043490                                          | malate-aspartate shuttle                      | 0.0909   | 21.47        | GO:0046697                                        | decidualization                                                  | 0.0125   | 5.35         |
| GO:1909927                                          | calcium ion regulated lysosome exocytosis     | 0.0909   | 21.47        | GO:0032700                                        | negative regulation of interleukin-17 production                 | 0.0126   | 7.79         |
| GO:1901205                                          | negative regulation of adrenergic receptor    | 0.0909   | 21.47        | GO:0051024                                        | positive regulation of immunoglobulin secretion                  | 0.0126   | 7.79         |
| GO:1904017                                          | cellular response to Thyrolobulin             | 0.0909   | 21.47        | GO:0051764                                        | actin crosslink formation                                        | 0.0126   | 7.79         |
| GO:0071109                                          | superior temporal gyrus development           | 0.0909   | 21.47        | GO:0006024                                        | glycosaminoglycan biosynthetic process                           | 0.0126   | 3.57         |
| GO:0021965                                          | spinal cord ventral commissure                | 0.0909   | 21.47        | GO:0008203                                        | cholesterol metabolic process                                    | 0.0135   | 2.83         |
| GO:0021549                                          | cerebellum development                        | 0.0914   | 2.90         | GO:0045765                                        | regulation of angiogenesis                                       | 0.0135   | 4.15         |
| GO:0043161                                          | proteasome-mediated ubiquitin-dependent       | 0.0919   | 1.59         | GO:0030513                                        | positive regulation of BMP signaling pathway                     | 0.0135   | 4.15         |
| GO:0008344                                          | adult locomotory behavior                     | 0.0931   | 2.48         | GO:0016477                                        | cell migration                                                   | 0.0148   | 1.99         |
| GO:0042472                                          | inner ear morphogenesis                       | 0.0931   | 2.48         | GO:0016049                                        | cell growth                                                      | 0.0148   | 3.06         |
| GO:0016192                                          | vesicle-mediated transport                    | 0.0974   | 1.70         | GO:0042346                                        | positive regulation of NF-kappaB import into nucleus             | 0.0149   | 5.10         |
| GO:0018107                                          | peptidyl-threonine phosphorylation            | 0.0986   | 2.83         | GO:0071480                                        | cellular response to gamma radiation                             | 0.0149   | 5.10         |
| GO:0019933                                          | cAMP-mediated signaling                       | 0.0986   | 2.83         | GO:0031954                                        | positive regulation of protein autophosphorylation               | 0.0149   | 5.10         |
| GO:0009790                                          | embryo development                            | 0.0986   | 2.83         | GO:0051894                                        | positive regulation of focal adhesion assembly                   | 0.0149   | 5.10         |
|                                                     |                                               |          |              | GO:0046677                                        | response to antibiotic                                           | 0.0154   | 4.02         |

|            |                                                                    |        |       |
|------------|--------------------------------------------------------------------|--------|-------|
| GO:0045595 | regulation of cell differentiation                                 | 0.0154 | 4.02  |
| GO:0001974 | blood vessel remodeling                                            | 0.0154 | 4.02  |
| GO:0007155 | cell adhesion                                                      | 0.0155 | 1.54  |
| GO:0001934 | positive regulation of protein phosphorylation                     | 0.0156 | 2.19  |
| GO:0002687 | positive regulation of leukocyte migration                         | 0.0162 | 7.14  |
| GO:0050710 | negative regulation of cytokine secretion                          | 0.0162 | 7.14  |
| GO:1990440 | positive regulation of transcription from RNA polymerase II        | 0.0162 | 7.14  |
| GO:0097067 | cellular response to thyroid hormone stimulus                      | 0.0162 | 7.14  |
| GO:0070301 | cellular response to hydrogen peroxide                             | 0.0162 | 3.01  |
| GO:0032088 | negative regulation of NF-kappaB transcription factor activity     | 0.0172 | 2.72  |
| GO:0071347 | cellular response to interleukin-1                                 | 0.0172 | 2.72  |
| GO:0010718 | positive regulation of epithelial to mesenchymal transition        | 0.0175 | 3.89  |
| GO:0006928 | movement of cell or subcellular component                          | 0.0186 | 2.49  |
| GO:0001822 | kidney development                                                 | 0.0186 | 2.49  |
| GO:0003151 | outflow tract morphogenesis                                        | 0.0193 | 3.26  |
| GO:0001837 | epithelial to mesenchymal transition                               | 0.0197 | 3.78  |
| GO:0038033 | positive regulation of endothelial cell chemotaxis by VEGF-        | 0.0198 | 12.85 |
| GO:1990314 | cellular response to insulin-like growth factor stimulus           | 0.0198 | 12.85 |
| GO:0070306 | lens fiber cell differentiation                                    | 0.0203 | 6.59  |
| GO:0001878 | response to veast                                                  | 0.0203 | 6.59  |
| GO:0051770 | positive regulation of nitric-oxide synthase biosynthetic process  | 0.0203 | 6.59  |
| GO:0031641 | regulation of myelination                                          | 0.0203 | 6.59  |
| GO:0050679 | positive regulation of epithelial cell proliferation               | 0.0211 | 2.86  |
| GO:0032760 | positive regulation of tumor necrosis factor production            | 0.0212 | 3.19  |
| GO:0051781 | positive regulation of cell division                               | 0.0212 | 3.19  |
| GO:0045600 | positive regulation of fat cell differentiation                    | 0.0212 | 3.19  |
| GO:0071230 | cellular response to amino acid stimulus                           | 0.0212 | 3.19  |
| GO:0006865 | amino acid transport                                               | 0.0221 | 3.67  |
| GO:0050918 | positive chemotaxis                                                | 0.0221 | 3.67  |
| GO:0007517 | muscle organ development                                           | 0.0228 | 2.41  |
| GO:0034976 | response to endoplasmic reticulum stress                           | 0.0232 | 2.57  |
| GO:0010862 | positive regulation of pathway-restricted SMAD protein             | 0.0234 | 3.12  |
| GO:0048041 | focal adhesion assembly                                            | 0.0237 | 4.46  |
| GO:0043065 | positive regulation of apoptotic process                           | 0.0243 | 1.64  |
| GO:0060395 | SMAD protein signal transduction                                   | 0.0248 | 2.76  |
| GO:0032743 | positive regulation of interleukin-2 production                    | 0.0250 | 6.12  |
| GO:0014070 | response to organic cyclic compound                                | 0.0256 | 3.06  |
| GO:0030308 | negative regulation of cell growth                                 | 0.0258 | 2.12  |
| GO:0032355 | response to estradiol                                              | 0.0259 | 2.35  |
| GO:0071158 | positive regulation of cell cycle arrest                           | 0.0272 | 4.28  |
| GO:0051898 | negative regulation of protein kinase B signaling                  | 0.0273 | 3.47  |
| GO:0042130 | negative regulation of T cell proliferation                        | 0.0276 | 3.47  |
| GO:0006936 | muscle contraction                                                 | 0.0276 | 2.20  |
| GO:0000187 | activation of MAPK activity                                        | 0.0276 | 2.20  |
| GO:0034134 | toll-like receptor 2 signaling pathway                             | 0.0287 | 10.71 |
| GO:0090336 | positive regulation of brown fat cell differentiation              | 0.0287 | 10.71 |
| GO:0001765 | membrane raft assembly                                             | 0.0287 | 10.71 |
| GO:0060754 | positive regulation of mast cell chemotaxis                        | 0.0287 | 10.71 |
| GO:0010742 | macrophage derived foam cell differentiation                       | 0.0287 | 10.71 |
| GO:0060137 | maternal process involved in parturition                           | 0.0287 | 10.71 |
| GO:0006966 | alcohol metabolic process                                          | 0.0287 | 10.71 |
| GO:0097084 | vascular smooth muscle cell development                            | 0.0287 | 10.71 |
| GO:0010042 | response to manganese ion                                          | 0.0287 | 10.71 |
| GO:2000679 | positive regulation of transcription regulatory region DNA         | 0.0302 | 5.71  |
| GO:0046688 | response to copper ion                                             | 0.0302 | 5.71  |
| GO:0032270 | positive regulation of cellular protein metabolic process          | 0.0302 | 5.71  |
| GO:0050930 | induction of positive chemotaxis                                   | 0.0302 | 5.71  |
| GO:0034446 | substrate adhesion-dependent cell spreading                        | 0.0306 | 3.38  |
| GO:0045930 | negative regulation of mitotic cell cycle                          | 0.0310 | 4.12  |
| GO:0001503 | ossification                                                       | 0.0326 | 2.41  |
| GO:0034097 | response to cytokine                                               | 0.0332 | 2.88  |
| GO:0043410 | positive regulation of MAPK cascade                                | 0.0338 | 2.38  |
| GO:0071456 | cellular response to hypoxia                                       | 0.0350 | 2.23  |
| GO:0032728 | positive regulation of interferon-beta production                  | 0.0351 | 3.97  |
| GO:0030949 | positive regulation of vascular endothelial growth factor receptor | 0.0359 | 5.35  |
| GO:0003203 | endocardial cushion morphogenesis                                  | 0.0359 | 5.35  |
| GO:0048593 | camera-type eye morphogenesis                                      | 0.0359 | 5.35  |
| GO:0008283 | cell proliferation                                                 | 0.0366 | 1.52  |
| GO:0006418 | tRNA aminoacylation for protein translation                        | 0.0372 | 3.21  |
| GO:0045944 | positive regulation of transcription from RNA polymerase II        | 0.0377 | 1.29  |
| GO:0048146 | positive regulation of fibroblast proliferation                    | 0.0390 | 2.78  |
| GO:0006769 | nicotinamide metabolic process                                     | 0.0390 | 9.18  |
| GO:1901385 | regulation of voltage-gated calcium channel activity               | 0.0390 | 9.18  |
| GO:0048251 | elastic fiber assembly                                             | 0.0390 | 9.18  |
| GO:0071455 | cellular response to hyperoxia                                     | 0.0390 | 9.18  |
| GO:0034616 | response to laminar fluid shear stress                             | 0.0390 | 9.18  |
| GO:0071679 | commissural neuron axon guidance                                   | 0.0390 | 9.18  |
| GO:0043392 | negative regulation of DNA binding                                 | 0.0395 | 3.82  |
| GO:0043388 | positive regulation of DNA binding                                 | 0.0395 | 3.82  |
| GO:0031589 | cell-substrate adhesion                                            | 0.0421 | 5.04  |
| GO:0007219 | Notch signaling pathway                                            | 0.0423 | 2.05  |
| GO:0030855 | epithelial cell differentiation                                    | 0.0441 | 2.45  |
| GO:0048008 | platelet-derived growth factor receptor signaling pathway          | 0.0441 | 2.27  |
| GO:0009636 | response to toxic substance                                        | 0.0444 | 2.27  |
| GO:0002548 | monocyte chemotaxis                                                | 0.0446 | 3.06  |
| GO:0006986 | response to unfolded protein                                       | 0.0446 | 3.06  |
| GO:0097191 | extrinsic apoptotic signaling pathway                              | 0.0446 | 3.06  |
| GO:0051496 | positive regulation of stress fiber assembly                       | 0.0446 | 3.06  |
| GO:0008202 | steroid metabolic process                                          | 0.0486 | 2.99  |
| GO:0070266 | necrototic process                                                 | 0.0489 | 4.76  |
| GO:0031668 | cellular response to extracellular stimulus                        | 0.0489 | 4.76  |
| GO:0051017 | actin filament bundle assembly                                     | 0.0491 | 3.57  |
| GO:0055072 | iron ion homeostasis                                               | 0.0491 | 3.57  |
| GO:0032731 | positive regulation of interleukin-1 beta production               | 0.0504 | 8.03  |
| GO:0034128 | negative regulation of MyD88-independent toll-like receptor        | 0.0504 | 8.03  |
| GO:0071236 | cellular response to antibiotic                                    | 0.0504 | 8.03  |
| GO:0043129 | surfactant homeostasis                                             | 0.0504 | 8.03  |
| GO:0001955 | blood vessel maturation                                            | 0.0504 | 8.03  |
| GO:0061180 | mammary gland epithelium development                               | 0.0504 | 8.03  |
| GO:0032825 | positive regulation of natural killer cell differentiation         | 0.0504 | 8.03  |
| GO:0010888 | negative regulation of lipid storage                               | 0.0504 | 8.03  |
| GO:0002576 | platelet degranulation                                             | 0.0511 | 2.08  |
| GO:0070373 | negative regulation of ERK1 and ERK2 cascade                       | 0.0524 | 2.48  |
| GO:0051259 | protein oligomerization                                            | 0.0524 | 2.58  |
| GO:0043200 | response to amino acid                                             | 0.0544 | 3.45  |
| GO:0006915 | apoptotic process                                                  | 0.0549 | 1.36  |
| GO:0001701 | in utero embryonic development                                     | 0.0551 | 1.72  |
| GO:0010629 | negative regulation of gene expression                             | 0.0555 | 1.88  |
| GO:0046579 | positive regulation of Ras protein signal transduction             | 0.0561 | 4.51  |
| GO:0060122 | inner ear receptor stereocilium organization                       | 0.0561 | 4.51  |
| GO:0045879 | negative regulation of smoothened signaling pathway                | 0.0561 | 4.51  |
| GO:0007584 | response to nutrient                                               | 0.0566 | 2.32  |
| GO:0032755 | positive regulation of interleukin-6 production                    | 0.0572 | 2.86  |
| GO:0006935 | chemotaxis                                                         | 0.0589 | 1.93  |
| GO:0050900 | leukocyte migration                                                | 0.0589 | 1.93  |
| GO:0050873 | brown fat cell differentiation                                     | 0.0600 | 3.35  |
| GO:0042102 | positive regulation of T cell proliferation                        | 0.0600 | 2.50  |
| GO:0043433 | negative regulation of sequence-specific DNA binding               | 0.0600 | 2.50  |
| GO:0010595 | positive regulation of endothelial cell migration                  | 0.0618 | 2.79  |
| GO:0032729 | positive regulation of interferon-gamma production                 | 0.0618 | 2.79  |
| GO:0048103 | somatic stem cell division                                         | 0.0629 | 7.14  |

|            |                                                                   |        |       |
|------------|-------------------------------------------------------------------|--------|-------|
| GO:0046007 | negative regulation of activated T cell proliferation             | 0.0629 | 7.14  |
| GO:0090244 | Wnt signaling pathway involved in somitogenesis                   | 0.0629 | 7.14  |
| GO:0035767 | endothelial cell chemotaxis                                       | 0.0629 | 7.14  |
| GO:0050807 | regulation of synapse organization                                | 0.0629 | 7.14  |
| GO:0002237 | response to molecule of bacterial origin                          | 0.0629 | 7.14  |
| GO:0006220 | pyrimidine nucleotide metabolic process                           | 0.0629 | 7.14  |
| GO:0035313 | wound healing, spreading of epidermal cells                       | 0.0629 | 7.14  |
| GO:1900119 | positive regulation of execution phase of apoptosis               | 0.0629 | 7.14  |
| GO:0071243 | cellular response to arsenic-containing substance                 | 0.0629 | 7.14  |
| GO:0030216 | keratinocyte differentiation                                      | 0.0636 | 2.25  |
| GO:0060021 | palate development                                                | 0.0636 | 2.25  |
| GO:0017015 | regulation of transforming growth factor beta receptor signaling  | 0.0638 | 4.28  |
| GO:0006541 | glutamine metabolic process                                       | 0.0638 | 4.28  |
| GO:0001933 | negative regulation of protein phosphorylation                    | 0.0640 | 2.46  |
| GO:0006508 | proteolysis                                                       | 0.0648 | 1.37  |
| GO:0009887 | organ morphogenesis                                               | 0.0651 | 2.10  |
| GO:0010634 | positive regulation of epithelial cell migration                  | 0.0658 | 3.25  |
| GO:0042110 | T cell activation                                                 | 0.0667 | 2.73  |
| GO:0051260 | protein homooligomerization                                       | 0.0709 | 1.69  |
| GO:0045987 | positive regulation of smooth muscle contraction                  | 0.0719 | 4.08  |
| GO:0045861 | negative regulation of proteolysis                                | 0.0719 | 4.08  |
| GO:0048844 | artery morphogenesis                                              | 0.0719 | 4.08  |
| GO:0042730 | fibrinolysis                                                      | 0.0719 | 4.08  |
| GO:0043330 | response to exogenous dsRNA                                       | 0.0720 | 3.15  |
| GO:0050727 | regulation of inflammatory response                               | 0.0726 | 2.38  |
| GO:0043123 | positive regulation of I-kappaB kinase/NF-kappaB signaling        | 0.0738 | 1.73  |
| GO:0050728 | negative regulation of inflammatory response                      | 0.0751 | 2.17  |
| GO:0003184 | pulmonary valve morphogenesis                                     | 0.0762 | 6.43  |
| GO:0051272 | positive regulation of cellular component movement                | 0.0762 | 6.43  |
| GO:0035999 | tetrahydrofolate interconversion                                  | 0.0762 | 6.43  |
| GO:0042359 | vitamin D metabolic process                                       | 0.0762 | 6.43  |
| GO:0046888 | negative regulation of hormone secretion                          | 0.0762 | 6.43  |
| GO:0060044 | negative regulation of cardiac muscle cell proliferation          | 0.0762 | 6.43  |
| GO:0032940 | secretion by cell                                                 | 0.0762 | 6.43  |
| GO:0010737 | protein kinase A signaling                                        | 0.0762 | 6.43  |
| GO:0048048 | embryonic eye morphogenesis                                       | 0.0762 | 6.43  |
| GO:0014067 | negative regulation of phosphatidylinositol 3-kinase signaling    | 0.0762 | 6.43  |
| GO:0033160 | positive regulation of protein import into nucleus, translocation | 0.0762 | 6.43  |
| GO:0046653 | tetrahydrofolate metabolic process                                | 0.0762 | 6.43  |
| GO:0071560 | cellular response to transforming growth factor beta stimulus     | 0.0769 | 2.62  |
| GO:0042632 | cholesterol homeostasis                                           | 0.0771 | 2.34  |
| GO:0090090 | negative regulation of canonical Wnt signaling pathway            | 0.0793 | 1.71  |
| GO:0006090 | pyruvate metabolic process                                        | 0.0805 | 3.89  |
| GO:0090023 | positive regulation of neutrophil chemotaxis                      | 0.0805 | 3.89  |
| GO:0034113 | heterotypic cell-cell adhesion                                    | 0.0805 | 3.89  |
| GO:0046427 | positive regulation of JAK-STAT cascade                           | 0.0805 | 3.89  |
| GO:0043627 | response to estrogen                                              | 0.0818 | 2.31  |
| GO:0051384 | response to glucocorticoid                                        | 0.0818 | 2.31  |
| GO:0030593 | neutrophil chemotaxis                                             | 0.0866 | 2.27  |
| GO:0035924 | cellular response to vascular endothelial growth factor stimulus  | 0.0895 | 3.72  |
| GO:0032987 | positive regulation of collagen biosynthetic process              | 0.0895 | 3.72  |
| GO:0070536 | protein K63-linked ubiquitination                                 | 0.0895 | 3.72  |
| GO:0032733 | positive regulation of interleukin-10 production                  | 0.0895 | 3.72  |
| GO:0009617 | response to bacterium                                             | 0.0895 | 3.72  |
| GO:0031076 | embryonic camera-type eye development                             | 0.0904 | 5.84  |
| GO:0060445 | branching involved in salivary gland morphogenesis                | 0.0904 | 5.84  |
| GO:0046849 | bone remodeling                                                   | 0.0904 | 5.84  |
| GO:0045806 | negative regulation of endocytosis                                | 0.0904 | 5.84  |
| GO:0001946 | lymphangiogenesis                                                 | 0.0904 | 5.84  |
| GO:0032703 | negative regulation of interleukin-2 production                   | 0.0904 | 5.84  |
| GO:0050927 | positive regulation of positive chemotaxis                        | 0.0904 | 5.84  |
| GO:0048333 | mesodermal cell differentiation                                   | 0.0904 | 5.84  |
| GO:0048711 | positive regulation of astrocyte differentiation                  | 0.0904 | 5.84  |
| GO:0032495 | response to muramyl dipeptide                                     | 0.0904 | 5.84  |
| GO:0061045 | negative regulation of wound healing                              | 0.0904 | 5.84  |
| GO:0002446 | neutrophil mediated immunity                                      | 0.0904 | 5.84  |
| GO:0019049 | evasion or tolerance of host defenses by virus                    | 0.0911 | 21.42 |
| GO:0019322 | pentose biosynthetic process                                      | 0.0911 | 21.42 |
| GO:0038190 | VEGF-activated neuropilin signaling pathway                       | 0.0911 | 21.42 |
| GO:1905049 | negative regulation of metalloproteinase activity                 | 0.0911 | 21.42 |
| GO:0090259 | regulation of retinal ganglion cell axon guidance                 | 0.0911 | 21.42 |
| GO:0071418 | cellular response to amine stimulus                               | 0.0911 | 21.42 |
| GO:0046456 | icosanoid biosynthetic process                                    | 0.0911 | 21.42 |
| GO:0070427 | nucleotide-binding oligomerization domain containing 1 signaling  | 0.0911 | 21.42 |
| GO:0003430 | growth plate cartilage chondrocyte growth                         | 0.0911 | 21.42 |
| GO:0015942 | formate metabolic process                                         | 0.0911 | 21.42 |
| GO:0015966 | diadenosine tetraphosphate biosynthetic process                   | 0.0911 | 21.42 |
| GO:0060434 | bronchus morphogenesis                                            | 0.0911 | 21.42 |
| GO:0006011 | UDP-glucose metabolic process                                     | 0.0911 | 21.42 |
| GO:1902336 | positive regulation of retinal ganglion cell axon guidance        | 0.0911 | 21.42 |
| GO:0009051 | pentose-phosphate shunt, oxidative branch                         | 0.0911 | 21.42 |
| GO:0006919 | activation of cysteine-type endopeptidase activity involved in    | 0.0921 | 2.06  |
| GO:0051092 | positive regulation of NF-kappaB transcription factor activity    | 0.0926 | 1.77  |
| GO:0019233 | sensory perception of pain                                        | 0.0938 | 2.47  |
| GO:0070371 | ERK1 and ERK2 cascade                                             | 0.0989 | 3.57  |
| GO:0048870 | cell motility                                                     | 0.0989 | 3.57  |
| GO:0032720 | negative regulation of tumor necrosis factor production           | 0.0993 | 2.82  |
| GO:0010811 | positive regulation of cell-substrate adhesion                    | 0.0993 | 2.82  |

Supplementary Table S7

S7a) Table of commonly enriched GO terms in iNs and iPSC-iNs. Related to Fig.7.

| description                                             | Term       | iN_count | iN_pval     | iN_fold     | iN_benjamini | iPSCiN_count | iPSCiN_pval | iPSCiN_fold | iPSCiN_benjamini |
|---------------------------------------------------------|------------|----------|-------------|-------------|--------------|--------------|-------------|-------------|------------------|
| clustering of voltage-gated potassium channels          | GO:0045163 | 2        | 0.07181945  | 27.10573043 | 0.776890918  | 2            | 0.063122077 | 30.92449355 | 0.910407594      |
| potassium ion export across plasma membrane             | GO:0097623 | 2        | 0.094596886 | 20.32929782 | 0.844569952  | 2            | 0.083266989 | 23.19337017 | 0.934247631      |
| synaptic vesicle exocytosis                             | GO:0016079 | 6        | 0.000162    | 11.0887079  | 0.023283788  | 3            | 0.080293574 | 6.325464591 | 0.930876438      |
| regulation of potassium ion transmembrane transport     | GO:1901379 | 4        | 0.005356125 | 10.84229217 | 0.229363986  | 3            | 0.040237943 | 9.277348066 | 0.851969398      |
| ionotropic glutamate receptor signaling pathway         | GO:0035235 | 5        | 0.002571169 | 8.470540759 | 0.154614569  | 3            | 0.093320005 | 5.798342541 | 0.947842364      |
| glutamate receptor signaling pathway                    | GO:0007215 | 3        | 0.051077622 | 8.131719128 | 0.70170925   | 3            | 0.040237943 | 9.277348066 | 0.851969398      |
| response to nicotine                                    | GO:0035094 | 7        | 0.000257    | 7.692166743 | 0.028163856  | 5            | 0.007929489 | 6.268478423 | 0.513265624      |
| positive regulation of calcium ion-dependent exocytosis | GO:0045956 | 3        | 0.057449643 | 7.623486683 | 0.740422017  | 4            | 0.004481464 | 11.59668508 | 0.456296747      |
| cation transmembrane transport                          | GO:0098655 | 8        | 0.000157    | 6.776432607 | 0.02447448   | 4            | 0.083984463 | 3.865561694 | 0.932427459      |
| regulation of membrane potential                        | GO:0042391 | 12       | 2.03E-06    | 6.505375303 | 0.000959     | 10           | 3.19E-05    | 6.184898711 | 0.050680544      |
| glutamate secretion                                     | GO:0014047 | 4        | 0.030508574 | 5.808370806 | 0.567184497  | 4            | 0.021688933 | 6.62667719  | 0.707990752      |
| potassium ion transmembrane transport                   | GO:0071805 | 17       | 4.39E-08    | 5.712364677 | 4.15E-05     | 11           | 0.000284    | 4.216976394 | 0.206639886      |
| learning                                                | GO:0007612 | 8        | 0.000467    | 5.706469564 | 0.043225868  | 6            | 0.007491992 | 4.882814772 | 0.513330264      |
| cardiac conduction                                      | GO:0061337 | 6        | 0.004732138 | 5.421146086 | 0.215377716  | 6            | 0.00269414  | 6.184898711 | 0.329191019      |
| locomotory behavior                                     | GO:0007626 | 11       | 3.88E-05    | 5.324339905 | 0.008119911  | 9            | 0.000444    | 4.970007893 | 0.134642208      |
| positive regulation of synapse assembly                 | GO:0051965 | 8        | 0.000782    | 5.246270405 | 0.065081     | 5            | 0.044244598 | 3.740866156 | 0.856115543      |
| central nervous system development                      | GO:0007417 | 15       | 1.45E-06    | 5.082324455 | 0.000912     | 7            | 0.045056254 | 2.705893186 | 0.846857405      |
| negative regulation of neuron differentiation           | GO:0045665 | 7        | 0.002424111 | 5.082324455 | 0.151257569  | 6            | 0.006954474 | 4.970007893 | 0.50839991       |
| potassium ion transport                                 | GO:0006813 | 10       | 0.000178    | 4.958365322 | 0.023743704  | 6            | 0.03174396  | 3.394151732 | 0.786598311      |
| memory                                                  | GO:0007613 | 7        | 0.004059479 | 4.590486605 | 0.202567272  | 5            | 0.044244598 | 3.740866156 | 0.856115543      |
| chemical synaptic transmission                          | GO:0007268 | 27       | 2.37E-10    | 4.57409201  | 4.48E-07     | 13           | 0.0059056   | 2.512615101 | 0.474210594      |
| axonogenesis                                            | GO:0007409 | 11       | 0.000145    | 4.563719919 | 0.02465333   | 7            | 0.019086343 | 3.313338595 | 0.673870778      |
| neuron development                                      | GO:0048666 | 5        | 0.02592229  | 4.41941257  | 0.529004571  | 4            | 0.076004336 | 4.033629594 | 0.923754709      |
| neurotransmitter secretion                              | GO:0007269 | 5        | 0.036120318 | 3.986136828 | 0.624817946  | 5            | 0.023761442 | 4.54771964  | 0.717174035      |
| neuron migration                                        | GO:0001764 | 10       | 0.001112788 | 3.872247204 | 0.080810269  | 10           | 0.000435    | 4.417784793 | 0.162255115      |
| regulation of ion transmembrane transport               | GO:0034765 | 10       | 0.001645849 | 3.662936544 | 0.112960556  | 10           | 0.000654    | 4.178985615 | 0.141054233      |
| regulation of insulin secretion                         | GO:0050796 | 6        | 0.024208175 | 3.641068266 | 0.509982106  | 6            | 0.014535116 | 4.154036448 | 0.629610882      |
| synapse assembly                                        | GO:0007416 | 5        | 0.062537502 | 3.332671774 | 0.754485021  | 7            | 0.001943012 | 5.323068563 | 0.271399742      |
| nervous system development                              | GO:0007399 | 23       | 2.55E-06    | 3.258354355 | 0.000964     | 17           | 0.000506    | 2.74764664  | 0.1283637        |
| axon guidance                                           | GO:0007411 | 11       | 0.005930277 | 2.812858818 | 0.230264987  | 12           | 0.000661    | 3.500886063 | 0.125918134      |
| brain development                                       | GO:0007420 | 11       | 0.019074577 | 2.353918695 | 0.449726518  | 11           | 0.008165984 | 2.685548124 | 0.504688499      |
| transport                                               | GO:0006810 | 20       | 0.001016804 | 2.336700899 | 0.080279776  | 13           | 0.073810548 | 1.732838001 | 0.925771743      |

S7b) Table of all GO terms enriched in down- and up-regulated genes in iNs versus fibroblasts, and iPSC-iNs versus iPSCs. Related to Fig.7.

| Term         | Description                                                      | Count | Benjamini  | Term       | Description                                                                | Count | Benjamini  |
|--------------|------------------------------------------------------------------|-------|------------|------------|----------------------------------------------------------------------------|-------|------------|
| iN_down      |                                                                  |       |            | iN_up      |                                                                            |       |            |
| GO:0051301   | cell division                                                    | 43    | 2.45E-13   | GO:0007268 | chemical synaptic transmission                                             | 27    | 4.48E-07   |
| GO:0098609   | cell-cell adhesion                                               | 29    | 5.50E-07   | GO:0071805 | potassium ion transmembrane transport                                      | 17    | 4.15E-05   |
| GO:0007062   | sister chromatid cohesion                                        | 16    | 4.66E-05   | GO:0007417 | central nervous system development                                         | 15    | 9.12E-04   |
| GO:0007067   | mitotic nuclear division                                         | 24    | 7.39E-05   | GO:0042391 | regulation of membrane potential                                           | 12    | 9.59E-04   |
| GO:0051017   | actin filament bundle assembly                                   | 9     | 2.97E-04   | GO:0007399 | nervous system development                                                 | 23    | 9.64E-04   |
| GO:0007076   | mitotic chromosome condensation                                  | 7     | 4.40E-04   | GO:0007218 | neuropeptide signaling pathway                                             | 13    | 0.00213378 |
| GO:0006260   | DNA replication                                                  | 15    | 0.01620475 | GO:0021707 | cerebellar granule cell differentiation                                    | 5     | 0.00623009 |
| GO:0030048   | actin filament-based movement                                    | 6     | 0.01490455 | GO:0021549 | cerebellum development                                                     | 8     | 0.00653324 |
| GO:0007059   | chromosome segregation                                           | 10    | 0.01495381 | GO:0007626 | locomotory behavior                                                        | 11    | 0.00811991 |
| GO:0007052   | mitotic spindle organization                                     | 7     | 0.02227078 | GO:0035725 | sodium ion transmembrane transport                                         | 10    | 0.01343861 |
| GO:0001701   | in utero embryonic development                                   | 16    | 0.02185359 | GO:0007409 | axonogenesis                                                               | 11    | 0.02465333 |
| GO:0045765   | regulation of angiogenesis                                       | 7     | 0.02251181 | GO:0098655 | cation transmembrane transport                                             | 8     | 0.02447448 |
| GO:0051056   | regulation of small GTPase mediated signal transduction          | 13    | 0.03186185 | GO:0060078 | regulation of postsynaptic membrane potential                              | 6     | 0.02328379 |
| GO:0007229   | integrin-mediated signaling pathway                              | 11    | 0.03777637 | GO:0016079 | synaptic vesicle exocytosis                                                | 6     | 0.02328379 |
| GO:0008360   | regulation of cell shape                                         | 13    | 0.04136013 | GO:0006813 | potassium ion transport                                                    | 10    | 0.0237437  |
| GO:0000082   | G1/S transition of mitotic cell cycle                            | 11    | 0.04209825 | GO:0086091 | regulation of heart rate by cardiac conduction                             | 7     | 0.02328449 |
| GO:0000070   | mitotic sister chromatid segregation                             | 6     | 0.04986004 | GO:0086012 | membrane depolarization during cardiac muscle cell action potential        | 5     | 0.02501254 |
| GO:0071897   | DNA biosynthetic process                                         | 6     | 0.05686589 | GO:0035094 | response to nicotine                                                       | 7     | 0.02816386 |
| GO:0034616   | response to laminar fluid shear stress                           | 4     | 0.0627906  | GO:0007271 | synaptic transmission, cholinergic                                         | 7     | 0.02816386 |
| GO:0007179   | transforming growth factor beta receptor signaling pathway       | 10    | 0.06690727 | GO:0017157 | regulation of exocytosis                                                   | 6     | 0.03844869 |
| GO:0042117   | monocyte activation                                              | 4     | 0.08797532 | GO:0086005 | ventricular cardiac muscle cell action potential                           | 5     | 0.03841284 |
| GO:0030335   | positive regulation of cell migration                            | 14    | 0.09878239 | GO:0007612 | learning                                                                   | 8     | 0.04322587 |
| iPSC_iN_down |                                                                  |       |            | GO:2000117 | negative regulation of cysteine-type endopeptidase activity                | 5     | 0.04528739 |
| GO:0030198   | extracellular matrix organization                                | 15    | 0.20253865 | GO:0086002 | cardiac muscle cell action potential involved in contraction               | 5     | 0.04528739 |
| GO:0030335   | positive regulation of cell migration                            | 14    | 0.19663062 | GO:0051965 | positive regulation of synapse assembly                                    | 8     | 0.065081   |
| GO:0035019   | somatic stem cell population maintenance                         | 8     | 0.29677418 | GO:0006810 | transport                                                                  | 20    | 0.08027978 |
| GO:0016266   | O-glycan processing                                              | 7     | 0.6180297  | GO:0010765 | positive regulation of sodium ion transport                                | 5     | 0.07826129 |
| GO:0060395   | SMAD protein signal transduction                                 | 7     | 0.59803918 | GO:0001764 | neuron migration                                                           | 10    | 0.08081027 |
| GO:0006936   | muscle contraction                                               | 9     | 0.55298412 | iPSC_iN_up |                                                                            |       |            |
| GO:0016540   | protein autophagy                                                | 4     | 0.50213229 | GO:0042391 | regulation of membrane potential                                           | 10    | 0.05068054 |
| GO:0003382   | epithelial cell morphogenesis                                    | 4     | 0.53433765 | GO:0071805 | potassium ion transmembrane transport                                      | 11    | 0.20663989 |
| GO:0008284   | positive regulation of cell proliferation                        | 21    | 0.54186876 | GO:0000160 | phosphorelay signal transduction system                                    | 4     | 0.16099862 |
| GO:1904707   | positive regulation of vascular smooth muscle cell proliferation | 4     | 0.52865355 | GO:0001764 | neuron migration                                                           | 10    | 0.16225512 |
| GO:0030168   | platelet activation                                              | 9     | 0.49613517 | GO:0007626 | locomotory behavior                                                        | 9     | 0.13464221 |
| GO:0070374   | positive regulation of ERK1 and ERK2 cascade                     | 11    | 0.58579783 | GO:0007399 | nervous system development                                                 | 17    | 0.1283637  |
| GO:2000249   | regulation of actin cytoskeleton reorganization                  | 4     | 0.628204   | GO:0034765 | regulation of ion transmembrane transport                                  | 10    | 0.14105423 |
| GO:0018108   | peptidyl-tyrosine phosphorylation                                | 10    | 0.61058416 | GO:0007411 | axon guidance                                                              | 12    | 0.12591813 |
| GO:0016337   | single organismal cell-cell adhesion                             | 8     | 0.58918766 | GO:0043547 | positive regulation of GTPase activity                                     | 25    | 0.20113002 |
| GO:0030154   | cell differentiation                                             | 20    | 0.57565884 | GO:0007416 | synapse assembly                                                           | 7     | 0.27139974 |
| GO:0007166   | cell surface receptor signaling pathway                          | 14    | 0.59388133 | GO:0061337 | cardiac conduction                                                         | 6     | 0.32919102 |
| GO:0042060   | wound healing                                                    | 7     | 0.59035757 | GO:0045956 | positive regulation of calcium ion-dependent exocytosis                    | 4     | 0.45629675 |
| GO:0048015   | phosphatidylinositol-mediated signaling                          | 8     | 0.59658965 | GO:0002931 | response to ischemia                                                       | 5     | 0.48299449 |
| GO:0030049   | muscle filament sliding                                          | 5     | 0.59486363 | GO:0001508 | action potential                                                           | 4     | 0.46446782 |
| GO:0010837   | regulation of keratinocyte proliferation                         | 3     | 0.67496875 | GO:0007268 | chemical synaptic transmission                                             | 13    | 0.47421059 |
| GO:0045766   | positive regulation of angiogenesis                              | 8     | 0.69758356 | GO:0045665 | negative regulation of neuron differentiation                              | 6     | 0.50839991 |
| GO:0007601   | visual perception                                                | 11    | 0.68665858 | GO:0007612 | learning                                                                   | 6     | 0.51333026 |
| GO:0010863   | positive regulation of phospholipase C activity                  | 3     | 0.71294909 | GO:0035094 | response to nicotine                                                       | 5     | 0.51326562 |
| GO:0035456   | response to interferon-beta                                      | 3     | 0.71294909 | GO:0007420 | brain development                                                          | 11    | 0.50468885 |
| GO:0070588   | calcium ion transmembrane transport                              | 8     | 0.713888   | GO:0021516 | dorsal spinal cord development                                             | 3     | 0.52137637 |
| GO:0001938   | positive regulation of endothelial cell proliferation            | 6     | 0.73428974 | GO:2000096 | positive regulation of Wnt signaling pathway, planar cell polarity pathway | 3     | 0.52137637 |
| GO:0003151   | outflow tract morphogenesis                                      | 5     | 0.72631608 | GO:0050896 | response to stimulus                                                       | 6     | 0.56286991 |
| GO:0010595   | positive regulation of endothelial cell migration                | 5     | 0.72631608 | GO:0007379 | segment specification                                                      | 3     | 0.58595536 |
| GO:0006935   | chemotaxis                                                       | 8     | 0.71789653 | GO:0035556 | intracellular signal transduction                                          | 17    | 0.63361299 |
| GO:0050900   | leukocyte migration                                              | 8     | 0.71789653 | GO:0050796 | regulation of insulin secretion                                            | 6     | 0.62961088 |
| GO:0035455   | response to interferon-alpha                                     | 3     | 0.7205214  | GO:0051291 | protein heterooligomerization                                              | 6     | 0.62961088 |
| GO:0070098   | chemokine-mediated signaling pathway                             | 6     | 0.72359054 | GO:0018095 | protein polyglutamylation                                                  | 3     | 0.62662828 |

| Term       | Description                                                                                 | Count | Benjamini  |
|------------|---------------------------------------------------------------------------------------------|-------|------------|
| GO:0006955 | immune response                                                                             | 17    | 0.78562155 |
| GO:2000648 | positive regulation of stem cell proliferation                                              | 3     | 0.80850546 |
| GO:0090399 | replicative senescence                                                                      | 3     | 0.80850546 |
| GO:0007281 | germ cell development                                                                       | 4     | 0.80090288 |
| GO:0045944 | positive regulation of transcription from RNA polymerase II promoter                        | 32    | 0.79969328 |
| GO:0014066 | regulation of phosphatidylinositol 3-kinase signaling                                       | 6     | 0.79541355 |
| GO:0006508 | proteolysis                                                                                 | 19    | 0.79248787 |
| GO:0051807 | defense response to virus                                                                   | 9     | 0.79154207 |
| GO:0045651 | positive regulation of macrophage differentiation                                           | 3     | 0.80311547 |
| GO:0006813 | potassium ion transport                                                                     | 6     | 0.82109396 |
| GO:0043401 | steroid hormone mediated signaling pathway                                                  | 5     | 0.83014403 |
| GO:0010839 | negative regulation of keratinocyte proliferation                                           | 3     | 0.82384074 |
| GO:0050918 | positive chemotaxis                                                                         | 4     | 0.85045141 |
| GO:0072593 | reactive oxygen species metabolic process                                                   | 4     | 0.85045141 |
| GO:0002042 | cell migration involved in sprouting angiogenesis                                           | 3     | 0.84861409 |
| GO:0008585 | female gonad development                                                                    | 3     | 0.84861409 |
| GO:0051260 | protein homooligomerization                                                                 | 9     | 0.84822545 |
| GO:0048661 | positive regulation of smooth muscle cell proliferation                                     | 5     | 0.84359874 |
| GO:1902943 | positive regulation of voltage-gated chloride channel activity                              | 2     | 0.83882505 |
| GO:0043407 | negative regulation of MAP kinase activity                                                  | 4     | 0.83892842 |
| GO:0042981 | regulation of apoptotic process                                                             | 10    | 0.85114094 |
| GO:0007179 | transforming growth factor beta receptor signaling pathway                                  | 6     | 0.87658906 |
| GO:0032331 | negative regulation of chondrocyte differentiation                                          | 3     | 0.87190405 |
| GO:0071276 | cellular response to cadmium ion                                                            | 3     | 0.87190405 |
| GO:1902476 | chloride transmembrane transport                                                            | 6     | 0.87631013 |
| GO:0043087 | regulation of GTPase activity                                                               | 5     | 0.87281271 |
| GO:0014068 | positive regulation of phosphatidylinositol 3-kinase signaling                              | 5     | 0.87281271 |
| GO:0046854 | phosphatidylinositol phosphorylation                                                        | 6     | 0.87628258 |
| GO:0008285 | negative regulation of cell proliferation                                                   | 15    | 0.8738897  |
| GO:0043280 | positive regulation of cysteine-type endopeptidase activity involved in apoptotic process   | 4     | 0.86997803 |
| GO:0030225 | macrophage differentiation                                                                  | 3     | 0.87009444 |
| GO:0050870 | positive regulation of T cell activation                                                    | 3     | 0.87009444 |
| GO:0007597 | blood coagulation, intrinsic pathway                                                        | 3     | 0.87009444 |
| GO:0051209 | release of sequestered calcium ion into cytosol                                             | 4     | 0.87685551 |
| GO:0001842 | neural fold formation                                                                       | 2     | 0.88599365 |
| GO:1900005 | positive regulation of serine-type endopeptidase activity                                   | 2     | 0.88599365 |
| GO:2000544 | regulation of endothelial cell chemotaxis to fibroblast growth factor                       | 2     | 0.88599365 |
| GO:1900164 | nodal signaling pathway involved in determination of lateral mesoderm left/right asymmetry  | 2     | 0.88599365 |
| GO:0060715 | syncytiotrophoblast cell differentiation involved in labyrinthine layer development         | 2     | 0.88599365 |
| GO:0071294 | cellular response to zinc ion                                                               | 3     | 0.88247022 |
| GO:0045926 | negative regulation of growth                                                               | 3     | 0.88247022 |
| GO:0002548 | monocyte chemotaxis                                                                         | 4     | 0.87914417 |
| GO:0010628 | positive regulation of gene expression                                                      | 11    | 0.88140296 |
| GO:0045785 | positive regulation of cell adhesion                                                        | 4     | 0.88561642 |
| GO:0035584 | calcium-mediated signaling using intracellular calcium source                               | 3     | 0.88958788 |
| GO:1902895 | positive regulation of pri-miRNA transcription from RNA polymerase II promoter              | 3     | 0.88958788 |
| GO:0032496 | response to lipopolysaccharide                                                              | 8     | 0.88857654 |
| GO:0007275 | multicellular organism development                                                          | 18    | 0.88648318 |
| GO:0016338 | calcium-independent cell-cell adhesion via plasma membrane cell-adhesion molecules          | 3     | 0.8997086  |
| GO:0007187 | G-protein coupled receptor signaling pathway, coupled to cyclic nucleotide second messenger | 4     | 0.90641342 |
| GO:0051091 | positive regulation of sequence-specific DNA binding transcription factor activity          | 6     | 0.90938391 |
| GO:0010719 | negative regulation of epithelial to mesenchymal transition                                 | 3     | 0.90872356 |
| GO:0051781 | positive regulation of cell division                                                        | 4     | 0.90832045 |
| GO:0061041 | regulation of wound healing                                                                 | 2     | 0.90607647 |
| GO:0051919 | positive regulation of fibrinolysis                                                         | 2     | 0.90607647 |
| GO:0033634 | positive regulation of cell-cell adhesion mediated by integrin                              | 2     | 0.90607647 |
| GO:0038001 | paracrine signaling                                                                         | 2     | 0.90607647 |
| GO:0031077 | post-embryonic camera-type eye development                                                  | 2     | 0.90607647 |
| GO:0022617 | extracellular matrix disassembly                                                            | 5     | 0.90824161 |
| GO:0010862 | positive regulation of pathway-restricted SMAD protein phosphorylation                      | 4     | 0.91031218 |
| GO:0008360 | regulation of cell shape                                                                    | 7     | 0.90994997 |
| GO:0035924 | cellular response to vascular endothelial growth factor stimulus                            | 3     | 0.90806858 |
| GO:0034220 | ion transmembrane transport                                                                 | 9     | 0.91471518 |
| GO:0009615 | response to virus                                                                           | 6     | 0.91660806 |
| GO:0019827 | stem cell population maintenance                                                            | 4     | 0.9171152  |

| Term       | Description                                                                       | Count | Benjamini  |
|------------|-----------------------------------------------------------------------------------|-------|------------|
| GO:0006836 | neurotransmitter transport                                                        | 4     | 0.67444446 |
| GO:0048935 | peripheral nervous system neuron development                                      | 3     | 0.67573534 |
| GO:0007409 | axogenesis                                                                        | 7     | 0.67387078 |
| GO:0014047 | glutamate secretion                                                               | 4     | 0.70799075 |
| GO:0030036 | actin cytoskeleton organization                                                   | 8     | 0.70622907 |
| GO:0007269 | neurotransmitter secretion                                                        | 5     | 0.71717404 |
| GO:0000187 | activation of MAPK activity                                                       | 7     | 0.76391651 |
| GO:0007601 | visual perception                                                                 | 10    | 0.77851049 |
| GO:0006813 | potassium ion transport                                                           | 6     | 0.78659831 |
| GO:1901381 | positive regulation of potassium ion transmembrane transport                      | 3     | 0.8519694  |
| GO:0046928 | regulation of neurotransmitter secretion                                          | 3     | 0.8519694  |
| GO:0007215 | glutamate receptor signaling pathway                                              | 3     | 0.8519694  |
| GO:1901379 | regulation of potassium ion transmembrane transport                               | 3     | 0.8519694  |
| GO:0007264 | small GTPase mediated signal transduction                                         | 11    | 0.8459321  |
| GO:0007423 | sensory organ development                                                         | 2     | 0.85229569 |
| GO:0007613 | memory                                                                            | 5     | 0.85611554 |
| GO:0051965 | positive regulation of synapse assembly                                           | 5     | 0.85611554 |
| GO:2001240 | negative regulation of extrinsic apoptotic signaling pathway in absence of ligand | 4     | 0.85176677 |
| GO:0048813 | dendrite morphogenesis                                                            | 4     | 0.85176677 |
| GO:0007417 | central nervous system development                                                | 7     | 0.84685741 |
| GO:0016486 | peptide hormone processing                                                        | 3     | 0.84160612 |
| GO:0018108 | peptidyl-tyrosine phosphorylation                                                 | 8     | 0.84856794 |
| GO:0001574 | ganglioside biosynthetic process                                                  | 3     | 0.88816953 |
| GO:0061763 | multivesicular body-lysosome fusion                                               | 2     | 0.91040759 |
| GO:1900452 | regulation of long term synaptic depression                                       | 2     | 0.91040759 |
| GO:0033387 | putrescine biosynthetic process from ornithine                                    | 2     | 0.91040759 |
| GO:0033605 | positive regulation of catecholamine secretion                                    | 2     | 0.91040759 |
| GO:0072102 | glomerulus morphogenesis                                                          | 2     | 0.91040759 |
| GO:0045163 | clustering of voltage-gated potassium channels                                    | 2     | 0.91040759 |
| GO:0030070 | insulin processing                                                                | 2     | 0.91040759 |
| GO:2000463 | positive regulation of excitatory postsynaptic potential                          | 3     | 0.92143761 |
| GO:0097503 | sialylation                                                                       | 3     | 0.92143761 |
| GO:0035584 | calcium-mediated signaling using intracellular calcium source                     | 3     | 0.92143761 |
| GO:0019226 | transmission of nerve impulse                                                     | 3     | 0.92143761 |
| GO:0023014 | signal transduction by protein phosphorylation                                    | 4     | 0.91847131 |
| GO:0032870 | cellular response to hormone stimulus                                             | 4     | 0.92526337 |
| GO:0006810 | transport                                                                         | 13    | 0.92577174 |
| GO:0050772 | positive regulation of axonogenesis                                               | 3     | 0.92229185 |
| GO:0048666 | neuron development                                                                | 4     | 0.92375471 |
| GO:0016079 | synaptic vesicle exocytosis                                                       | 3     | 0.93087644 |
| GO:0001502 | cartilage condensation                                                            | 3     | 0.93087644 |
| GO:0039702 | viral budding via host ESCRT complex                                              | 3     | 0.93087644 |
| GO:0060999 | positive regulation of dendritic spine development                                | 3     | 0.93087644 |
| GO:0034653 | retinoic acid catabolic process                                                   | 2     | 0.93424763 |
| GO:0071395 | cellular response to jasmonic acid stimulus                                       | 2     | 0.93424763 |
| GO:0097623 | potassium ion export across plasma membrane                                       | 2     | 0.93424763 |
| GO:0071205 | protein localization to juxtaparanode region of axon                              | 2     | 0.93424763 |
| GO:0051048 | negative regulation of secretion                                                  | 2     | 0.93424763 |
| GO:0010701 | positive regulation of norepinephrine secretion                                   | 2     | 0.93424763 |
| GO:0098655 | cation transmembrane transport                                                    | 4     | 0.93242746 |
| GO:0007422 | peripheral nervous system development                                             | 3     | 0.94784236 |
| GO:0035235 | ionotropic glutamate receptor signaling pathway                                   | 3     | 0.94784236 |
| GO:0000122 | negative regulation of transcription from RNA polymerase II promoter              | 22    | 0.95206633 |
